# Supplementary material for: Experimental and theoretical assessment of protonated Hoogsteen 9-methylguanine–1-methylcytosine base-pair dissociation: kinetics within a statistical reaction framework
Source: Royal Society of Chemistry journal article supplement (doi:10.1039/d0cp06682f), 2021-01-01
Supplement: d0cp06682f1.pdf [file d0cp06682f1.pdf]

Supporting Information

**Experimental and Theoretical Assessment of Protonated Hoogsteen 9-Methylguanine–  
1-Methylcytosine Base-Pair Dissociation: Kinetics within a Statistical Reaction Framework**

May Myat Moe,<sup>ab</sup> Jonathan Benny,<sup>ab</sup> Yan Sun,<sup>ab</sup> and Jianbo Liu<sup>\*ab</sup>

<sup>a</sup>Department of Chemistry and Biochemistry, Queens College of the City University of New York,  
65-30 Kissena Blvd., Queens, NY 11367, USA; <sup>b</sup> Ph.D. Program in Chemistry, The Graduate Center of  
the City University of New York, 365 5th Ave., New York, NY 10016, USA

**Table of Contents**

|                                                                                                               |     |
|---------------------------------------------------------------------------------------------------------------|-----|
| Cartesian coordinates for the structures of HG-[9MG·1MC + H] <sup>+</sup> in Figure 1 .....                   | S2  |
| Cartesian coordinates for the structures of HG-[9MG·1MC + H] <sup>+</sup> ·H <sub>2</sub> O in Figure 1 ..... | S4  |
| Cartesian coordinates for the structures in Figure 4.....                                                     | S8  |
| Cartesian coordinates for the structures in Figure 6.....                                                     | S11 |
| Loose TSs for base-pair dissociation .....                                                                    | S18 |

---

\*Corresponding author. E-mail: jianbo.liu@qc.cuny.edu. Telephone: 1-718-997-3271.

**Cartesian coordinates for the structures  
in Figure 1, optimized at  $\omega$ B97XD/  
6-311++ G(d,p).**

**HG-[9MG·1MC + H]<sup>+</sup>\_1**

**(HG-9MG·[1MC + H<sub>N3</sub>]<sup>+</sup>)**

|     |           |           |           |
|-----|-----------|-----------|-----------|
| C1  | -1.931107 | -1.442366 | -0.010694 |
| C2  | -1.638144 | -0.055147 | -0.010444 |
| C3  | -4.278253 | -0.677256 | -0.000014 |
| C4  | -0.737374 | 1.872188  | -0.005478 |
| N5  | -0.430335 | 0.601092  | -0.013268 |
| N6  | -2.088534 | 2.087400  | 0.001194  |
| N7  | -4.000617 | 0.601410  | -0.000999 |
| C8  | -2.678672 | 0.854920  | -0.000007 |
| N9  | -5.566188 | -1.083732 | 0.037968  |
| H10 | -6.268035 | -0.367623 | -0.048263 |
| H11 | -5.832574 | -2.028028 | -0.179049 |
| O12 | -1.156018 | -2.394576 | -0.011510 |
| H13 | -0.016478 | 2.677130  | -0.006253 |
| C14 | -2.781902 | 3.366019  | 0.029407  |
| H15 | -3.526692 | 3.394337  | -0.765050 |
| H16 | -3.275083 | 3.504250  | 0.991815  |
| H17 | -2.053678 | 4.160535  | -0.125440 |
| H18 | 1.132254  | -0.015499 | -0.013828 |
| C19 | 2.531665  | -1.592540 | 0.006385  |
| C20 | 3.926580  | -1.873955 | 0.019813  |
| C21 | 4.785584  | -0.827032 | 0.019140  |
| H22 | 4.289514  | -2.890509 | 0.031626  |
| H23 | 5.857734  | -0.979767 | 0.029503  |
| N24 | 2.156645  | -0.298596 | -0.006743 |
| C25 | 3.018959  | 0.786851  | -0.010814 |
| O26 | 2.621424  | 1.924408  | -0.027356 |
| N27 | 4.375324  | 0.464410  | 0.006714  |
| C28 | 5.318964  | 1.585254  | -0.006260 |
| H29 | 5.224882  | 2.137999  | -0.940781 |
| H30 | 5.102168  | 2.255270  | 0.824420  |
| H31 | 6.328306  | 1.190160  | 0.091029  |
| N32 | 1.609767  | -2.535171 | 0.006756  |
| H33 | 1.901005  | -3.498815 | 0.016592  |
| H34 | 0.591852  | -2.353101 | -0.002346 |
| N35 | -3.314579 | -1.661376 | -0.004394 |
| H36 | -3.586596 | -2.634662 | 0.030152  |

**HG-[9MG·1MC + H]<sup>+</sup>\_2**

**(HG-9MG + H<sub>N7</sub>]<sup>+</sup>·1MC)**

|     |           |           |           |
|-----|-----------|-----------|-----------|
| C1  | -1.927032 | -1.493369 | -0.004072 |
| C2  | -1.602540 | -0.105503 | -0.003303 |
| C3  | -4.251501 | -0.635894 | 0.002855  |
| C4  | -0.638193 | 1.839850  | -0.007520 |
| N5  | -0.394384 | 0.547671  | -0.007942 |
| N6  | -1.969314 | 2.065507  | -0.003858 |
| N7  | -3.925935 | 0.636725  | 0.003658  |
| C8  | -2.601079 | 0.840975  | 0.000032  |
| N9  | -5.548506 | -0.985119 | 0.005539  |
| H10 | -6.232983 | -0.247761 | 0.009047  |

|     |           |           |           |
|-----|-----------|-----------|-----------|
| H11 | -5.863027 | -1.938848 | 0.005423  |
| O12 | -1.180810 | -2.453724 | -0.007158 |
| H13 | 0.137063  | 2.591660  | -0.010631 |
| C14 | -2.638699 | 3.361323  | 0.013394  |
| H15 | -3.369380 | 3.398139  | -0.793063 |
| H16 | -3.143039 | 3.501624  | 0.968951  |
| H17 | -1.892327 | 4.140584  | -0.128788 |
| H18 | 0.601232  | 0.094372  | -0.010218 |
| C19 | 2.612949  | -1.630162 | 0.000825  |
| C20 | 4.030048  | -1.806433 | 0.010380  |
| C21 | 4.789229  | -0.686567 | 0.011521  |
| H22 | 4.483524  | -2.786576 | 0.016984  |
| H23 | 5.871413  | -0.730216 | 0.018829  |
| N24 | 2.081632  | -0.409940 | -0.007099 |
| C25 | 2.854261  | 0.716103  | -0.006072 |
| O26 | 2.368143  | 1.838215  | -0.013238 |
| N27 | 4.243203  | 0.553922  | 0.004062  |
| C28 | 5.062636  | 1.763996  | 0.002535  |
| H29 | 4.859719  | 2.347822  | -0.895019 |
| H30 | 4.826265  | 2.371890  | 0.875400  |
| H31 | 6.112785  | 1.477276  | 0.026484  |
| N32 | 1.789058  | -2.681339 | -0.000166 |
| H33 | 2.160389  | -3.615026 | 0.005939  |
| H34 | 0.778467  | -2.563923 | -0.005612 |
| N35 | -3.324031 | -1.653872 | -0.000416 |
| H36 | -3.631291 | -2.617745 | -0.000451 |

**HG-[9MG·1MC + H]<sup>+</sup>\_3**

**(HG-9MG(enol)·[1MC + H<sub>N3</sub>]<sup>+</sup>)**

|     |           |           |           |
|-----|-----------|-----------|-----------|
| C1  | -2.160560 | -1.408917 | -0.019362 |
| C2  | -1.680390 | -0.102987 | -0.014401 |
| C3  | -4.310891 | -0.615699 | 0.008530  |
| C4  | -0.675117 | 1.776362  | -0.013745 |
| N5  | -0.431273 | 0.489192  | -0.024461 |
| N6  | -2.005836 | 2.072573  | 0.001349  |
| N7  | -3.983920 | 0.680183  | 0.015480  |
| C8  | -2.674274 | 0.873768  | 0.002836  |
| N9  | -5.619515 | -0.933203 | 0.018896  |
| H10 | -6.306302 | -0.200666 | 0.033872  |
| H11 | -5.901242 | -1.896535 | 0.015997  |
| O12 | -1.306162 | -2.452409 | -0.035844 |
| H13 | 0.091922  | 2.538085  | -0.018222 |
| C14 | -2.624534 | 3.387802  | 0.034292  |
| H15 | -3.359053 | 3.464026  | -0.766838 |
| H16 | -3.121205 | 3.543133  | 0.992385  |
| H17 | -1.852494 | 4.143148  | -0.104669 |
| H18 | 1.114159  | -0.054591 | -0.026373 |
| C19 | 2.554441  | -1.595821 | 0.010265  |
| C20 | 3.947376  | -1.864936 | 0.035764  |
| C21 | 4.793577  | -0.804697 | 0.034312  |
| H22 | 4.323489  | -2.876492 | 0.057222  |
| H23 | 5.867515  | -0.943790 | 0.053894  |
| N24 | 2.156595  | -0.313753 | -0.014798 |
| C25 | 3.004533  | 0.783542  | -0.018135 |
| O26 | 2.593483  | 1.915241  | -0.042558 |
| N27 | 4.366152  | 0.478360  | 0.010049  |

|     |           |           |           |
|-----|-----------|-----------|-----------|
| C28 | 5.294319  | 1.613416  | -0.001520 |
| H29 | 5.190665  | 2.164694  | -0.935705 |
| H30 | 5.066998  | 2.278829  | 0.829992  |
| H31 | 6.309217  | 1.232868  | 0.094992  |
| N32 | 1.639062  | -2.554149 | 0.010805  |
| H33 | 1.932845  | -3.516334 | 0.029224  |
| H34 | 0.637548  | -2.368809 | -0.008472 |
| N35 | -3.444445 | -1.662743 | -0.007969 |
| H36 | -1.841249 | -3.256446 | -0.038575 |

#### HG-[9MG·1MC + H]<sup>+</sup>\_4

##### (HG-[9MG + H<sub>N7</sub>]<sup>+</sup>(*enol*)·1MC)

|     |           |           |           |
|-----|-----------|-----------|-----------|
| C1  | -2.137568 | -1.450573 | -0.006479 |
| C2  | -1.661858 | -0.137423 | -0.005795 |
| C3  | -4.284134 | -0.627148 | 0.005787  |
| C4  | -0.644992 | 1.789488  | -0.010574 |
| N5  | -0.431676 | 0.489132  | -0.012399 |
| N6  | -1.962581 | 2.056830  | -0.004167 |
| N7  | -3.944954 | 0.669086  | 0.006686  |
| C8  | -2.638175 | 0.848777  | 0.000312  |
| N9  | -5.590578 | -0.932454 | 0.011657  |
| H10 | -6.273447 | -0.195336 | 0.017438  |
| H11 | -5.880322 | -1.894159 | 0.011605  |
| O12 | -1.285326 | -2.479426 | -0.013337 |
| H13 | 0.155291  | 2.515258  | -0.014367 |
| C14 | -2.594327 | 3.370845  | 0.014511  |
| H15 | -3.316581 | 3.431174  | -0.798255 |
| H16 | -3.105316 | 3.517203  | 0.965640  |
| H17 | -1.826062 | 4.130919  | -0.114887 |
| H18 | 0.541482  | 0.044825  | -0.015329 |
| C19 | 2.702868  | -1.636269 | 0.001821  |
| C20 | 4.122728  | -1.763674 | 0.015324  |
| C21 | 4.838227  | -0.614378 | 0.016023  |
| H22 | 4.612342  | -2.726189 | 0.024948  |
| H23 | 5.921263  | -0.614581 | 0.026100  |
| N24 | 2.116918  | -0.445601 | -0.009738 |
| C25 | 2.847263  | 0.709128  | -0.008270 |
| O26 | 2.322220  | 1.813213  | -0.017366 |
| N27 | 4.242599  | 0.601204  | 0.004602  |
| C28 | 5.013433  | 1.843439  | 0.004513  |
| H29 | 4.780547  | 2.423004  | -0.888375 |
| H30 | 4.759056  | 2.436590  | 0.882453  |
| H31 | 6.074255  | 1.598676  | 0.019446  |
| N32 | 1.917712  | -2.723716 | 0.000680  |
| H33 | 2.315971  | -3.645857 | 0.009407  |
| H34 | 0.912488  | -2.627045 | -0.008195 |
| N35 | -3.424357 | -1.681101 | -0.000437 |
| H36 | -1.808499 | -3.291707 | -0.013243 |

**Cartesian coordinates for the structures  
in Figure 1, optimized at  $\omega$ B97XD/  
6-311++ G(d,p).**

**HG-[9MG·1MC + H]<sup>+</sup>·H<sub>2</sub>O\_1**

|     |           |           |           |
|-----|-----------|-----------|-----------|
| C1  | -1.777697 | -0.937746 | -0.005328 |
| C2  | -1.278442 | 0.390486  | -0.005302 |
| C3  | -3.978472 | 0.163172  | 0.002102  |
| C4  | -0.102620 | 2.165701  | -0.007921 |
| N5  | 0.013760  | 0.863260  | -0.009586 |
| N6  | -1.407014 | 2.577187  | -0.004449 |
| N7  | -3.516124 | 1.392247  | 0.003203  |
| C8  | -2.173796 | 1.444468  | -0.001130 |
| N9  | -5.304190 | -0.060244 | 0.005008  |
| H10 | -5.914301 | 0.738092  | 0.008417  |
| H11 | -5.678136 | -0.997803 | 0.004416  |
| O12 | -1.143207 | -1.993346 | -0.007765 |
| H13 | 0.727777  | 2.857017  | -0.010767 |
| C14 | -1.907602 | 3.941843  | 0.017940  |
| H15 | -2.634177 | 4.077032  | -0.782683 |
| H16 | -2.385912 | 4.149854  | 0.975425  |
| H17 | -1.072456 | 4.624967  | -0.129193 |
| H18 | 1.454378  | 0.036964  | -0.010075 |
| C19 | 2.604034  | -1.733772 | 0.002541  |
| C20 | 3.940983  | -2.224669 | 0.011456  |
| C21 | 4.948572  | -1.320475 | 0.010996  |
| H22 | 4.143715  | -3.284846 | 0.018803  |
| H23 | 5.985408  | -1.633482 | 0.017726  |
| N24 | 2.428935  | -0.398068 | -0.006172 |
| C25 | 3.445798  | 0.542832  | -0.006058 |
| O26 | 3.228461  | 1.728426  | -0.012801 |
| N27 | 4.738145  | 0.018226  | 0.002461  |
| C28 | 5.839205  | 0.983866  | 0.001561  |
| H29 | 5.781820  | 1.608146  | -0.889548 |
| H30 | 5.772357  | 1.620801  | 0.882966  |
| H31 | 6.781039  | 0.438605  | 0.010504  |
| N32 | 1.550265  | -2.525535 | 0.002556  |
| H33 | 1.694560  | -3.521781 | 0.009304  |
| H34 | 0.567229  | -2.193488 | -0.003234 |
| N35 | -3.171487 | -0.953200 | -0.001526 |
| H36 | -3.617140 | -1.869143 | -0.001163 |
| O37 | -5.257824 | -3.033611 | -0.000028 |
| H38 | -5.454630 | -3.578608 | 0.765393  |
| H39 | -5.456778 | -3.575422 | -0.767156 |

**2**

|    |          |           |           |
|----|----------|-----------|-----------|
| C1 | 1.957273 | 1.403955  | -0.008390 |
| C2 | 1.848791 | -0.011463 | -0.013404 |
| C3 | 4.386524 | 0.949543  | 0.006845  |
| C4 | 1.208413 | -2.039473 | -0.016134 |
| N5 | 0.737627 | -0.819974 | -0.020333 |
| N6 | 2.576413 | -2.076461 | -0.008194 |
| N7 | 4.278171 | -0.353404 | -0.001093 |
| C8 | 2.999532 | -0.777170 | -0.003646 |
| N9 | 5.612081 | 1.520899  | 0.056943  |

|     |           |           |           |
|-----|-----------|-----------|-----------|
| H10 | 6.397497  | 0.898642  | -0.038802 |
| H11 | 5.753424  | 2.485381  | -0.188050 |
| O12 | 1.067012  | 2.246795  | -0.008055 |
| H13 | 0.599692  | -2.932372 | -0.019888 |
| C14 | 3.430738  | -3.253013 | 0.016668  |
| H15 | 4.191090  | -3.166956 | -0.758767 |
| H16 | 3.916050  | -3.346490 | 0.988562  |
| H17 | 2.818791  | -4.133760 | -0.171747 |
| H18 | -0.909887 | -0.419132 | -0.015553 |
| C19 | -2.511513 | 0.946992  | -0.002523 |
| C20 | -3.935660 | 1.029632  | 0.007857  |
| C21 | -4.636435 | -0.126414 | 0.013148  |
| H22 | -4.421341 | 1.993931  | 0.012291  |
| H23 | -5.719408 | -0.129229 | 0.021891  |
| N24 | -1.959338 | -0.284956 | -0.007888 |
| C25 | -2.660805 | -1.479334 | -0.003568 |
| O26 | -2.107425 | -2.551821 | -0.009766 |
| N27 | -4.046657 | -1.350703 | 0.008599  |
| C28 | -4.822100 | -2.592313 | 0.011441  |
| H29 | -4.599621 | -3.169627 | -0.885576 |
| H30 | -4.563305 | -3.187456 | 0.886642  |
| H31 | -5.881049 | -2.342032 | 0.036083  |
| N32 | -1.743475 | 2.013670  | -0.006681 |
| H33 | -2.194319 | 2.926715  | -0.002949 |
| H34 | -0.715171 | 1.973325  | -0.010561 |
| N35 | 3.303566  | 1.799567  | 0.002907  |
| H36 | 3.446880  | 2.799350  | 0.048687  |
| O37 | -3.445744 | 4.361043  | 0.002228  |
| H38 | -3.569131 | 4.925541  | -0.763897 |
| H39 | -3.558202 | 4.929907  | 0.766801  |

**3**

|     |           |           |           |
|-----|-----------|-----------|-----------|
| C1  | 1.884189  | -0.960662 | 0.030002  |
| C2  | 1.411216  | 0.373780  | 0.022702  |
| C3  | 4.101903  | 0.081886  | -0.027792 |
| C4  | 0.280332  | 2.178126  | 0.027850  |
| N5  | 0.131304  | 0.879010  | 0.043740  |
| N6  | 1.593415  | 2.557836  | -0.001387 |
| N7  | 3.671116  | 1.321465  | -0.039271 |
| C8  | 2.332019  | 1.407269  | -0.006426 |
| N9  | 5.428310  | -0.164355 | -0.028565 |
| H10 | 6.043009  | 0.623805  | -0.140926 |
| H11 | 5.794691  | -1.085160 | -0.195597 |
| O12 | 1.219983  | -2.007087 | 0.052827  |
| H13 | -0.533288 | 2.889251  | 0.038658  |
| C14 | 2.126530  | 3.910271  | -0.044648 |
| H15 | 2.859084  | 4.039531  | 0.751430  |
| H16 | 2.605169  | 4.092673  | -1.007057 |
| H17 | 1.308192  | 4.614721  | 0.095652  |
| H18 | -1.338008 | 0.109235  | 0.048876  |
| C19 | -2.547363 | -1.616274 | -0.030777 |
| C20 | -3.898226 | -2.060871 | -0.081710 |
| C21 | -4.874811 | -1.122416 | -0.068392 |
| H22 | -4.136650 | -3.112459 | -0.131198 |
| H23 | -5.921323 | -1.399000 | -0.105262 |
| N24 | -2.327173 | -0.289658 | 0.028419  |

|     |           |           |           |
|-----|-----------|-----------|-----------|
| C25 | -3.310937 | 0.686108  | 0.038786  |
| O26 | -3.051851 | 1.862128  | 0.086111  |
| N27 | -4.619755 | 0.206788  | -0.010345 |
| C28 | -5.688277 | 1.208754  | 0.012277  |
| H29 | -5.657352 | 1.760920  | 0.951273  |
| H30 | -5.554219 | 1.907419  | -0.812471 |
| H31 | -6.645158 | 0.699904  | -0.086448 |
| N32 | -1.518650 | -2.442828 | -0.038702 |
| H33 | -1.695365 | -3.432502 | -0.087844 |
| H34 | -0.529452 | -2.141652 | 0.001669  |
| N35 | 3.273831  | -1.011709 | 0.009434  |
| H36 | 3.666267  | -1.959438 | 0.041500  |
| O37 | 3.476628  | -3.765015 | 0.001339  |
| H38 | 2.515933  | -3.683896 | 0.063809  |
| H39 | 3.734163  | -4.555219 | 0.477229  |

**4**

|     |           |           |           |
|-----|-----------|-----------|-----------|
| C1  | -1.427135 | -1.622635 | 0.005199  |
| C2  | -1.214521 | -0.221196 | 0.013910  |
| C3  | -3.822913 | -1.002964 | 0.020535  |
| C4  | -0.422604 | 1.753650  | 0.010608  |
| N5  | -0.045748 | 0.502861  | 0.005123  |
| N6  | -1.785186 | 1.891631  | 0.022120  |
| N7  | -3.610177 | 0.299345  | 0.032501  |
| C8  | -2.305323 | 0.627218  | 0.025989  |
| N9  | -5.074238 | -1.480142 | 0.035915  |
| H10 | -5.835655 | -0.803102 | -0.019205 |
| H11 | -5.270393 | -2.457818 | -0.083344 |
| O12 | -0.596933 | -2.527179 | -0.004262 |
| H13 | 0.251595  | 2.598123  | 0.004959  |
| C14 | -2.546756 | 3.129425  | 0.036513  |
| H15 | -3.273001 | 3.123820  | -0.776432 |
| H16 | -3.064032 | 3.242623  | 0.990079  |
| H17 | -1.860350 | 3.963223  | -0.101878 |
| H18 | 1.545128  | -0.026254 | -0.005908 |
| C19 | 3.039689  | -1.514488 | -0.003431 |
| C20 | 4.449557  | -1.708477 | -0.000783 |
| C21 | 5.241332  | -0.609491 | -0.001112 |
| H22 | 4.875741  | -2.700179 | 0.002339  |
| H23 | 6.320949  | -0.695614 | 0.000868  |
| N24 | 2.585110  | -0.246260 | -0.006618 |
| C25 | 3.377484  | 0.890823  | -0.010167 |
| O26 | 2.909455  | 2.001554  | -0.017765 |
| N27 | 4.751238  | 0.653930  | -0.003328 |
| C28 | 5.622348  | 1.831957  | -0.015648 |
| H29 | 5.482245  | 2.386047  | -0.943533 |
| H30 | 5.373665  | 2.479332  | 0.824060  |
| H31 | 6.656011  | 1.501498  | 0.066246  |
| N32 | 2.176606  | -2.511385 | -0.002466 |
| H33 | 2.525470  | -3.455776 | -0.000489 |
| H34 | 1.149553  | -2.390301 | -0.004407 |
| N35 | -2.794385 | -1.921566 | 0.008799  |
| H36 | -3.008226 | -2.909748 | 0.015417  |
| O37 | -6.407327 | 0.984163  | -0.157819 |
| H38 | -5.497727 | 1.277827  | -0.015475 |
| H39 | -6.982026 | 1.556174  | 0.351481  |

**5**

|     |           |           |           |
|-----|-----------|-----------|-----------|
| C1  | 2.008077  | 1.174539  | 0.000759  |
| C2  | 1.685181  | -0.206656 | -0.003014 |
| C3  | 4.340991  | 0.365956  | -0.006323 |
| C4  | 0.757152  | -2.121412 | -0.000252 |
| N5  | 0.466784  | -0.846897 | -0.000880 |
| N6  | 2.104951  | -2.357574 | -0.003192 |
| N7  | 4.038378  | -0.905839 | -0.011575 |
| C8  | 2.712221  | -1.134801 | -0.002832 |
| N9  | 5.636494  | 0.748971  | 0.027016  |
| H10 | 6.323639  | 0.019506  | -0.067143 |
| H11 | 5.919313  | 1.686388  | -0.199229 |
| O12 | 1.249121  | 2.142812  | 0.008084  |
| H13 | 0.024937  | -2.916660 | 0.000834  |
| C14 | 2.779387  | -3.646604 | 0.014735  |
| H15 | 3.520969  | -3.680836 | -0.782472 |
| H16 | 3.273437  | -3.798129 | 0.974662  |
| H17 | 2.038879  | -4.429129 | -0.142712 |
| H18 | -1.170459 | -0.325016 | -0.000723 |
| C19 | -2.536995 | 1.251262  | -0.004310 |
| C20 | -3.927506 | 1.558083  | -0.007828 |
| C21 | -4.801727 | 0.525090  | -0.009481 |
| H22 | -4.269028 | 2.581811  | -0.010039 |
| H23 | -5.871402 | 0.694305  | -0.012007 |
| N24 | -2.188602 | -0.053838 | -0.003589 |
| C25 | -3.065131 | -1.124161 | -0.000306 |
| O26 | -2.684117 | -2.268555 | 0.008292  |
| N27 | -4.414150 | -0.776473 | -0.008783 |
| C28 | -5.379267 | -1.878211 | 0.004766  |
| H29 | -5.173336 | -2.555357 | -0.822895 |
| H30 | -5.300753 | -2.430282 | 0.941294  |
| H31 | -6.380328 | -1.463781 | -0.097868 |
| N32 | -1.589723 | 2.157767  | -0.002222 |
| H33 | -1.775936 | 3.154615  | -0.000251 |
| H34 | -0.591756 | 1.923846  | 0.001552  |
| N35 | 3.394722  | 1.367337  | 0.000158  |
| H36 | 3.688363  | 2.333710  | 0.040283  |
| O37 | -0.340258 | 4.585511  | 0.012013  |
| H38 | -0.121901 | 5.516785  | 0.038090  |
| H39 | 0.491102  | 4.097394  | 0.017485  |

**6**

|     |           |           |           |
|-----|-----------|-----------|-----------|
| C1  | -2.398291 | -1.468700 | -0.008269 |
| C2  | -2.138526 | -0.074279 | -0.010085 |
| C3  | -4.763237 | -0.757224 | 0.007552  |
| C4  | -1.281837 | 1.872456  | -0.008627 |
| N5  | -0.946483 | 0.608951  | -0.016006 |
| N6  | -2.638046 | 2.057014  | 0.000679  |
| N7  | -4.516122 | 0.527231  | 0.003865  |
| C8  | -3.199744 | 0.811383  | 0.001967  |
| N9  | -6.042182 | -1.194452 | 0.052172  |
| H10 | -6.758409 | -0.493401 | -0.040218 |
| H11 | -6.285492 | -2.140977 | -0.182106 |
| O12 | -1.601761 | -2.402031 | -0.010069 |
| H13 | -0.578499 | 2.692894  | -0.011223 |
| C14 | -3.359612 | 3.319574  | 0.028359  |

|     |           |           |           |
|-----|-----------|-----------|-----------|
| H15 | -4.107589 | 3.329762  | -0.763585 |
| H16 | -3.852529 | 3.449825  | 0.992071  |
| H17 | -2.649562 | 4.129529  | -0.131051 |
| H18 | 0.642074  | 0.028767  | -0.019233 |
| C19 | 2.085358  | -1.504167 | -0.005735 |
| C20 | 3.484858  | -1.742910 | 0.003140  |
| C21 | 4.317560  | -0.671334 | 0.002060  |
| H22 | 3.877842  | -2.748328 | 0.011487  |
| H23 | 5.398149  | -0.782399 | 0.009779  |
| N24 | 1.671173  | -0.221824 | -0.015500 |
| C25 | 2.500983  | 0.888895  | -0.017007 |
| O26 | 2.066484  | 2.014263  | -0.025631 |
| N27 | 3.863700  | 0.605709  | -0.007512 |
| C28 | 4.779407  | 1.750890  | -0.011671 |
| H29 | 4.618629  | 2.343360  | -0.912091 |
| H30 | 4.584462  | 2.376288  | 0.859026  |
| H31 | 5.799341  | 1.371655  | 0.014704  |
| N32 | 1.186642  | -2.472230 | -0.004612 |
| H33 | 1.503287  | -3.427474 | 0.003081  |
| H34 | 0.166638  | -2.316029 | -0.009189 |
| N35 | -3.777441 | -1.718784 | 0.002002  |
| H36 | -4.027301 | -2.697747 | 0.041442  |
| O37 | 7.502829  | -0.374761 | 0.040763  |
| H38 | 8.066413  | -0.451849 | 0.813241  |
| H39 | 8.091934  | -0.452453 | -0.712366 |

**7**

|     |           |           |           |
|-----|-----------|-----------|-----------|
| C1  | -2.091959 | -1.603108 | 0.026942  |
| C2  | -1.737547 | -0.232485 | 0.021658  |
| C3  | -4.404846 | -0.747085 | -0.012613 |
| C4  | -0.764496 | 1.663317  | 0.019960  |
| N5  | -0.502259 | 0.379130  | 0.034695  |
| N6  | -2.105804 | 1.924311  | -0.003409 |
| N7  | -4.074069 | 0.517485  | -0.024686 |
| C8  | -2.742842 | 0.717948  | 0.000008  |
| N9  | -5.710093 | -1.101446 | 0.011209  |
| H10 | -6.377592 | -0.356987 | -0.104486 |
| H11 | -6.008279 | -2.031547 | -0.225754 |
| O12 | -1.360427 | -2.592083 | 0.044775  |
| H13 | -0.036421 | 2.465519  | 0.024035  |
| C14 | -2.737142 | 3.234921  | -0.015045 |
| H15 | -3.457807 | 3.285536  | -0.830534 |
| H16 | -3.249361 | 3.411909  | 0.930980  |
| H17 | -1.962753 | 3.986250  | -0.160977 |
| H18 | 1.050106  | -0.268249 | 0.042695  |
| C19 | 2.331913  | -1.945257 | -0.017177 |
| C20 | 3.700633  | -2.339152 | -0.058265 |
| C21 | 4.642553  | -1.370012 | -0.051347 |
| H22 | 3.974769  | -3.382580 | -0.096525 |
| H23 | 5.698720  | -1.606747 | -0.083312 |
| N24 | 2.058994  | -0.623201 | 0.027548  |
| C25 | 3.012764  | 0.377572  | 0.040267  |
| O26 | 2.720132  | 1.549462  | 0.088832  |
| N27 | 4.335147  | -0.048962 | -0.005307 |
| C28 | 5.368079  | 0.989885  | 0.011983  |
| H29 | 5.211224  | 1.678707  | -0.817060 |

|     |           |           |           |
|-----|-----------|-----------|-----------|
| H30 | 5.321762  | 1.543425  | 0.949605  |
| H31 | 6.341121  | 0.512808  | -0.086303 |
| N32 | 1.346428  | -2.816433 | -0.021505 |
| H33 | 1.572467  | -3.797325 | -0.054803 |
| H34 | 0.336450  | -2.575714 | 0.011184  |
| N35 | -3.481815 | -1.767866 | 0.012198  |
| H36 | -3.791853 | -2.729297 | 0.054991  |
| O37 | 1.291968  | 4.026008  | -0.103883 |
| H38 | 2.025330  | 3.406940  | -0.022049 |
| H39 | 1.610382  | 4.869860  | 0.217088  |

**8**

|     |           |           |           |
|-----|-----------|-----------|-----------|
| C1  | -2.204350 | -1.538954 | -0.007330 |
| C2  | -2.077803 | -0.125917 | -0.011156 |
| C3  | -4.626581 | -1.055777 | 0.006516  |
| C4  | -1.411692 | 1.893745  | -0.012868 |
| N5  | -0.956337 | 0.668326  | -0.017150 |
| N6  | -2.779121 | 1.947986  | -0.005818 |
| N7  | -4.502147 | 0.246090  | -0.000339 |
| C8  | -3.218887 | 0.654224  | -0.002020 |
| N9  | -5.858375 | -1.611794 | 0.053469  |
| H10 | -6.637488 | -0.981227 | -0.038427 |
| H11 | -6.011922 | -2.577487 | -0.178669 |
| O12 | -1.323083 | -2.392582 | -0.007405 |
| H13 | -0.791319 | 2.778620  | -0.015993 |
| C14 | -3.618397 | 3.135518  | 0.018554  |
| H15 | -4.378673 | 3.059541  | -0.757970 |
| H16 | -4.103640 | 3.234544  | 0.989907  |
| H17 | -2.994749 | 4.008277  | -0.168585 |
| H18 | 0.680579  | 0.244804  | -0.014925 |
| C19 | 2.264208  | -1.143750 | -0.006165 |
| C20 | 3.679885  | -1.248920 | 0.001083  |
| C21 | 4.402900  | -0.102778 | 0.005423  |
| H22 | 4.185130  | -2.203085 | 0.003796  |
| H23 | 5.485810  | -0.147550 | 0.011568  |
| N24 | 1.728943  | 0.093957  | -0.009857 |
| C25 | 2.448435  | 1.278481  | -0.005324 |
| O26 | 1.910106  | 2.358406  | -0.008146 |
| N27 | 3.832160  | 1.127066  | 0.002738  |
| C28 | 4.628385  | 2.355664  | 0.008144  |
| H29 | 4.400353  | 2.946994  | -0.878197 |
| H30 | 4.392844  | 2.944302  | 0.894354  |
| H31 | 5.682351  | 2.084988  | 0.012302  |
| N32 | 1.462216  | -2.193190 | -0.009412 |
| H33 | 1.870947  | -3.112895 | -0.005861 |
| H34 | 0.432127  | -2.136610 | -0.011180 |
| N35 | -3.553778 | -1.919072 | 0.002837  |
| H36 | -3.708861 | -2.917337 | 0.045305  |
| O37 | 6.857014  | -1.951139 | 0.014934  |
| H38 | 7.363204  | -2.235389 | 0.778363  |
| H39 | 7.369467  | -2.232775 | -0.745280 |

**9**

|    |           |           |           |
|----|-----------|-----------|-----------|
| C1 | -2.182772 | -1.448115 | 0.029075  |
| C2 | -1.869423 | -0.067068 | -0.057735 |
| C3 | -4.516884 | -0.642753 | 0.089391  |

|     |           |           |           |     |           |           |           |
|-----|-----------|-----------|-----------|-----|-----------|-----------|-----------|
| C4  | -0.941472 | 1.840689  | -0.200812 | C19 | 3.014246  | -1.486664 | -0.133238 |
| N5  | -0.653162 | 0.566904  | -0.145117 | C20 | 4.425998  | -1.629547 | -0.235138 |
| N6  | -2.288773 | 2.079334  | -0.154375 | C21 | 5.181411  | -0.505376 | -0.199630 |
| N7  | -4.220940 | 0.628581  | 0.003658  | H22 | 4.881557  | -2.602328 | -0.340754 |
| C8  | -2.895736 | 0.858969  | -0.060770 | H23 | 6.260789  | -0.551904 | -0.275536 |
| N9  | -5.808911 | -1.024330 | 0.203818  | N24 | 2.520468  | -0.240300 | -0.003949 |
| H10 | -6.501341 | -0.301731 | 0.097300  | C25 | 3.275356  | 0.921869  | 0.035162  |
| H11 | -6.097332 | -1.972645 | 0.037851  | O26 | 2.774071  | 2.011379  | 0.151515  |
| O12 | -1.424499 | -2.412293 | 0.047413  | N27 | 4.652954  | 0.735324  | -0.070976 |
| H13 | -0.209808 | 2.632231  | -0.277679 | C28 | 5.484411  | 1.941057  | -0.027546 |
| C14 | -2.963235 | 3.367566  | -0.182274 | H29 | 5.179429  | 2.625340  | -0.818142 |
| H15 | -3.706019 | 3.375543  | -0.979294 | H30 | 5.364538  | 2.437649  | 0.934946  |
| H16 | -3.456793 | 3.552076  | 0.772103  | H31 | 6.524298  | 1.652995  | -0.168832 |
| H17 | -2.223029 | 4.144468  | -0.366964 | N32 | 2.184258  | -2.511951 | -0.160526 |
| H18 | 0.923755  | -0.081966 | -0.211468 | H33 | 2.561412  | -3.440242 | -0.257662 |
| C19 | 2.286460  | -1.678809 | -0.237105 | H34 | 1.157775  | -2.427132 | -0.090704 |
| C20 | 3.670513  | -1.987819 | -0.321224 | N35 | -2.811073 | -2.090419 | 0.104270  |
| C21 | 4.542420  | -0.957775 | -0.441558 | H36 | -2.995865 | -3.082972 | 0.046125  |
| H22 | 4.016113  | -3.009982 | -0.293029 | O37 | -5.316175 | 2.130010  | -1.132336 |
| H23 | 5.609214  | -1.130409 | -0.511023 | H38 | -4.959382 | 1.324473  | -0.735426 |
| N24 | 1.933627  | -0.381518 | -0.287627 | H39 | -5.734719 | 1.873541  | -1.954269 |
| C25 | 2.815598  | 0.684215  | -0.346314 |     |           |           |           |
| O26 | 2.437998  | 1.830177  | -0.298824 |     |           |           |           |
| N27 | 4.154212  | 0.336034  | -0.490599 |     |           |           |           |
| C28 | 5.123527  | 1.431031  | -0.497254 |     |           |           |           |
| H29 | 4.807249  | 2.189222  | -1.210677 |     |           |           |           |
| H30 | 5.181983  | 1.870644  | 0.499071  |     |           |           |           |
| H31 | 6.094513  | 1.034303  | -0.788299 |     |           |           |           |
| N32 | 1.349603  | -2.602465 | -0.121749 |     |           |           |           |
| H33 | 1.623289  | -3.570551 | -0.097198 |     |           |           |           |
| H34 | 0.339824  | -2.399248 | -0.062988 |     |           |           |           |
| N35 | -3.569325 | -1.641640 | 0.103561  |     |           |           |           |
| H36 | -3.854478 | -2.606695 | 0.202617  |     |           |           |           |
| O37 | 3.491364  | 0.633012  | 2.375254  |     |           |           |           |
| H38 | 3.020784  | 1.453768  | 2.534384  |     |           |           |           |
| H39 | 3.704874  | 0.286704  | 3.243037  |     |           |           |           |

**10**

|     |           |           |           |
|-----|-----------|-----------|-----------|
| C1  | -1.451224 | -1.746749 | 0.068761  |
| C2  | -1.280750 | -0.340259 | 0.138147  |
| C3  | -3.854764 | -1.200033 | 0.177961  |
| C4  | -0.544834 | 1.650016  | 0.242163  |
| N5  | -0.132158 | 0.411735  | 0.153304  |
| N6  | -1.907269 | 1.753984  | 0.283116  |
| N7  | -3.688646 | 0.098217  | 0.229612  |
| C8  | -2.391159 | 0.479074  | 0.215718  |
| N9  | -5.105854 | -1.712474 | 0.160010  |
| H10 | -5.857919 | -1.077350 | 0.372752  |
| H11 | -5.275129 | -2.691257 | 0.314864  |
| O12 | -0.597717 | -2.623546 | -0.009208 |
| H13 | 0.106451  | 2.511462  | 0.279015  |
| C14 | -2.683484 | 2.981990  | 0.430362  |
| H15 | -3.440374 | 3.042650  | -0.351780 |
| H16 | -3.169893 | 2.994214  | 1.406134  |
| H17 | -1.999736 | 3.826043  | 0.355509  |
| H18 | 1.475332  | -0.059002 | 0.063628  |

**Cartesian coordinates for the structures  
in Figure 4, optimized at  $\omega$ B97XD/  
6-311++ G(d,p).**

**HG-9MG·[1MC + H<sub>N3'</sub>]<sup>+</sup>**

|     |           |           |           |
|-----|-----------|-----------|-----------|
| C1  | -1.931107 | -1.442366 | -0.010694 |
| C2  | -1.638144 | -0.055147 | -0.010444 |
| C3  | -4.278253 | -0.677256 | -0.000014 |
| C4  | -0.737374 | 1.872188  | -0.005478 |
| N5  | -0.430335 | 0.601092  | -0.013268 |
| N6  | -2.088534 | 2.087400  | 0.001194  |
| N7  | -4.000617 | 0.601410  | -0.000999 |
| C8  | -2.678672 | 0.854920  | -0.000007 |
| N9  | -5.566188 | -1.083732 | 0.037968  |
| H10 | -6.268035 | -0.367623 | -0.048263 |
| H11 | -5.832574 | -2.028028 | -0.179049 |
| O12 | -1.156018 | -2.394576 | -0.011510 |
| H13 | -0.016478 | 2.677130  | -0.006253 |
| C14 | -2.781902 | 3.366019  | 0.029407  |
| H15 | -3.526692 | 3.394337  | -0.765050 |
| H16 | -3.275083 | 3.504250  | 0.991815  |
| H17 | -2.053678 | 4.160535  | -0.125440 |
| H18 | 1.132254  | -0.015499 | -0.013828 |
| C19 | 2.531665  | -1.592540 | 0.006385  |
| C20 | 3.926580  | -1.873955 | 0.019813  |
| C21 | 4.785584  | -0.827032 | 0.019140  |
| H22 | 4.289514  | -2.890509 | 0.031626  |
| H23 | 5.857734  | -0.979767 | 0.029503  |
| N24 | 2.156645  | -0.298596 | -0.006743 |
| C25 | 3.018959  | 0.786851  | -0.010814 |
| O26 | 2.621424  | 1.924408  | -0.027356 |
| N27 | 4.375324  | 0.464410  | 0.006714  |
| C28 | 5.318964  | 1.585254  | -0.006260 |
| H29 | 5.224882  | 2.137999  | -0.940781 |
| H30 | 5.102168  | 2.255270  | 0.824420  |
| H31 | 6.328306  | 1.190160  | 0.091029  |
| N32 | 1.609767  | -2.535171 | 0.006756  |
| H33 | 1.901005  | -3.498815 | 0.016592  |
| H34 | 0.591852  | -2.353101 | -0.002346 |
| N35 | -3.314579 | -1.661376 | -0.004394 |
| H36 | -3.586596 | -2.634662 | 0.030152  |

**9MG**

|     |           |           |           |
|-----|-----------|-----------|-----------|
| C1  | 1.130078  | 1.404449  | 0.000953  |
| C2  | -0.252707 | 1.012959  | -0.010429 |
| C3  | 1.530191  | -1.060337 | 0.000920  |
| C4  | -2.362999 | 0.899735  | -0.009242 |
| N5  | -1.398413 | 1.772536  | -0.011645 |
| N6  | -1.921611 | -0.405464 | -0.008779 |
| N7  | 0.275565  | -1.407026 | -0.013323 |
| C8  | -0.560681 | -0.337519 | -0.006196 |
| N9  | 2.501787  | -2.026910 | 0.060594  |
| H10 | 2.152331  | -2.958101 | -0.101169 |
| H11 | 3.391817  | -1.830289 | -0.367766 |
| O12 | 1.649014  | 2.495475  | 0.013391  |

|     |           |           |           |
|-----|-----------|-----------|-----------|
| H13 | -3.419418 | 1.128912  | -0.010787 |
| C14 | -2.715824 | -1.615635 | 0.020462  |
| H15 | -2.383535 | -2.296716 | -0.763527 |
| H16 | -2.619839 | -2.114348 | 0.986647  |
| H17 | -3.760187 | -1.354346 | -0.148704 |
| N18 | 1.956342  | 0.237907  | 0.006673  |
| H19 | 2.942679  | 0.441882  | 0.084726  |

**[1MC + H<sub>N3'</sub>]<sup>+</sup>**

|     |           |           |           |
|-----|-----------|-----------|-----------|
| H1  | 1.019516  | 1.948980  | 0.000040  |
| C2  | 1.586902  | -0.038189 | -0.000003 |
| C3  | 1.059547  | -1.346102 | -0.000056 |
| C4  | -0.294556 | -1.489483 | -0.000001 |
| H5  | 1.708921  | -2.208219 | -0.000100 |
| H6  | -0.748789 | -2.472866 | -0.000035 |
| N7  | 0.705663  | 0.985433  | 0.000065  |
| C8  | -0.694773 | 0.868738  | 0.000009  |
| O9  | -1.407127 | 1.826607  | -0.000075 |
| N10 | -1.151611 | -0.448882 | 0.000096  |
| C11 | -2.611549 | -0.627244 | -0.000014 |
| H12 | -3.034998 | -0.157781 | 0.886815  |
| H13 | -3.034615 | -0.161159 | -0.888822 |
| H14 | -2.828944 | -1.693130 | 0.002008  |
| N15 | 2.887659  | 0.220768  | -0.000007 |
| H16 | 3.553812  | -0.535210 | -0.000060 |
| H17 | 3.256715  | 1.158969  | 0.000059  |

**TS\_PT3'**

|     |           |           |           |
|-----|-----------|-----------|-----------|
| C1  | -1.933338 | -1.484865 | -0.007187 |
| C2  | -1.580277 | -0.106757 | -0.004940 |
| C3  | -4.243355 | -0.598859 | 0.002770  |
| C4  | -0.591979 | 1.809427  | -0.007015 |
| N5  | -0.354321 | 0.517602  | -0.009684 |
| N6  | -1.922719 | 2.063954  | -0.001871 |
| N7  | -3.899195 | 0.667108  | 0.005264  |
| C8  | -2.570000 | 0.852424  | 0.000696  |
| N9  | -5.546066 | -0.931522 | 0.005981  |
| H10 | -6.220414 | -0.185130 | 0.011189  |
| H11 | -5.872837 | -1.880927 | 0.004667  |
| O12 | -1.204821 | -2.463725 | -0.011878 |
| H13 | 0.184043  | 2.560428  | -0.010007 |
| C14 | -2.568532 | 3.370166  | 0.019252  |
| H15 | -3.300114 | 3.423828  | -0.785668 |
| H16 | -3.069132 | 3.519528  | 0.975625  |
| H17 | -1.808922 | 4.136782  | -0.122545 |
| H18 | 0.763172  | 0.023410  | -0.011813 |
| C19 | 2.523133  | -1.619276 | 0.003094  |
| C20 | 3.932138  | -1.842487 | 0.015847  |
| C21 | 4.735625  | -0.754143 | 0.016434  |
| H22 | 4.346418  | -2.839672 | 0.025586  |
| H23 | 5.814908  | -0.843617 | 0.026197  |
| N24 | 2.047863  | -0.369441 | -0.008232 |
| C25 | 2.865076  | 0.733625  | -0.008990 |
| O26 | 2.422415  | 1.867621  | -0.020980 |
| N27 | 4.243330  | 0.507977  | 0.005593  |
| C28 | 5.113235  | 1.683870  | -0.000627 |



|     |           |           |           |
|-----|-----------|-----------|-----------|
| H29 | 4.953902  | 2.257821  | -0.913200 |
| H30 | 4.883905  | 2.316427  | 0.856093  |
| H31 | 6.148966  | 1.352696  | 0.051747  |
| N32 | 1.665138  | -2.635306 | 0.002591  |
| H33 | 2.012971  | -3.578642 | 0.011035  |
| H34 | 0.651778  | -2.502467 | -0.005931 |
| N35 | -3.329865 | -1.629142 | -0.002809 |
| H36 | -3.648909 | -2.589008 | -0.003931 |

**HG-[9MG + H<sub>N7</sub>]<sup>+</sup>·IMC**

|     |           |           |           |
|-----|-----------|-----------|-----------|
| C1  | -1.927032 | -1.493369 | -0.004072 |
| C2  | -1.602540 | -0.105503 | -0.003303 |
| C3  | -4.251501 | -0.635894 | 0.002855  |
| C4  | -0.638193 | 1.839850  | -0.007520 |
| N5  | -0.394384 | 0.547671  | -0.007942 |
| N6  | -1.969314 | 2.065507  | -0.003858 |
| N7  | -3.925935 | 0.636725  | 0.003658  |
| C8  | -2.601079 | 0.840975  | 0.000032  |
| N9  | -5.548506 | -0.985119 | 0.005539  |
| H10 | -6.232983 | -0.247761 | 0.009047  |
| H11 | -5.863027 | -1.938848 | 0.005423  |
| O12 | -1.180810 | -2.453724 | -0.007158 |
| H13 | 0.137063  | 2.591660  | -0.010631 |
| C14 | -2.638699 | 3.361323  | 0.013394  |
| H15 | -3.369380 | 3.398139  | -0.793063 |
| H16 | -3.143039 | 3.501624  | 0.968951  |
| H17 | -1.892327 | 4.140584  | -0.128788 |
| H18 | 0.601232  | 0.094372  | -0.010218 |
| C19 | 2.612949  | -1.630162 | 0.000825  |
| C20 | 4.030048  | -1.806433 | 0.010380  |
| C21 | 4.789229  | -0.686567 | 0.011521  |
| H22 | 4.483524  | -2.786576 | 0.016984  |
| H23 | 5.871413  | -0.730216 | 0.018829  |
| N24 | 2.081632  | -0.409940 | -0.007099 |
| C25 | 2.854261  | 0.716103  | -0.006072 |
| O26 | 2.368143  | 1.838215  | -0.013238 |
| N27 | 4.243203  | 0.553922  | 0.004062  |
| C28 | 5.062636  | 1.763996  | 0.002535  |
| H29 | 4.859719  | 2.347822  | -0.895019 |
| H30 | 4.826265  | 2.371890  | 0.875400  |
| H31 | 6.112785  | 1.477276  | 0.026484  |
| N32 | 1.789058  | -2.681339 | -0.000166 |
| H33 | 2.160389  | -3.615026 | 0.005939  |
| H34 | 0.778467  | -2.563923 | -0.005612 |
| N35 | -3.324031 | -1.653872 | -0.000416 |
| H36 | -3.631291 | -2.617745 | -0.000451 |

**[9MG + H<sub>N7</sub>]<sup>+</sup>**

|    |           |           |           |
|----|-----------|-----------|-----------|
| C1 | 1.153387  | 1.398786  | 0.001852  |
| C2 | -0.217631 | 0.964019  | 0.000834  |
| C3 | 1.581210  | -1.052177 | -0.000743 |
| C4 | -2.404023 | 0.785343  | -0.004237 |
| N5 | -1.406538 | 1.659251  | -0.001366 |
| N6 | -1.909182 | -0.457421 | -0.004626 |
| N7 | 0.311534  | -1.411732 | -0.000983 |
| C8 | -0.526600 | -0.372952 | -0.000628 |

|     |           |           |           |
|-----|-----------|-----------|-----------|
| N9  | 2.526371  | -1.999300 | -0.002373 |
| H10 | 2.230142  | -2.961391 | -0.003693 |
| H11 | 3.510630  | -1.795979 | -0.003168 |
| O12 | 1.585459  | 2.520555  | 0.002967  |
| H13 | -3.453385 | 1.033005  | -0.006545 |
| C14 | -2.668552 | -1.707067 | 0.006782  |
| H15 | -2.322258 | -2.336778 | -0.810936 |
| H16 | -2.507164 | -2.217000 | 0.955537  |
| H17 | -3.725100 | -1.479851 | -0.121220 |
| H18 | -1.500825 | 2.666100  | -0.003010 |
| N19 | 1.991770  | 0.259455  | 0.001338  |
| H20 | 2.979865  | 0.479973  | 0.002191  |

**IMC**

|     |           |           |           |
|-----|-----------|-----------|-----------|
| C1  | -1.536977 | -0.033495 | 0.002257  |
| C2  | -1.076252 | 1.322992  | 0.001068  |
| C3  | 0.265977  | 1.493961  | -0.000483 |
| H4  | -1.751207 | 2.166725  | 0.008661  |
| H5  | 0.723004  | 2.476723  | -0.000478 |
| N6  | -0.733676 | -1.069031 | -0.001581 |
| C7  | 0.620814  | -0.898799 | 0.000283  |
| O8  | 1.430823  | -1.802102 | -0.000464 |
| N9  | 1.110749  | 0.440485  | -0.000410 |
| C10 | 2.555970  | 0.612484  | -0.001696 |
| H11 | 2.989249  | 0.139041  | 0.879877  |
| H12 | 2.987771  | 0.140913  | -0.885030 |
| H13 | 2.786087  | 1.678197  | -0.000708 |
| N14 | -2.870707 | -0.282567 | 0.028971  |
| H15 | -3.538650 | 0.449909  | -0.126031 |
| H16 | -3.164592 | -1.239747 | -0.070019 |

**TS\_PT7**

|     |           |           |           |
|-----|-----------|-----------|-----------|
| C1  | -1.421056 | -1.325068 | -0.015381 |
| C2  | -1.503186 | 0.113414  | -0.013318 |
| C3  | -3.911277 | -1.196145 | 0.002832  |
| C4  | -1.232486 | 2.254278  | -0.008709 |
| N5  | -0.560193 | 1.128487  | -0.017579 |
| N6  | -2.568789 | 2.050173  | 0.000092  |
| N7  | -3.973138 | 0.111400  | 0.003353  |
| C8  | -2.762692 | 0.693690  | -0.000932 |
| N9  | -5.048295 | -1.919106 | 0.033388  |
| H10 | -5.917489 | -1.415824 | -0.023247 |
| H11 | -5.061256 | -2.913045 | -0.109957 |
| O12 | -0.473419 | -2.080814 | -0.020808 |
| H13 | -0.782715 | 3.235445  | -0.009290 |
| C14 | -3.622013 | 3.054750  | 0.029414  |
| H15 | -4.328785 | 2.861982  | -0.776465 |
| H16 | -4.144802 | 3.015800  | 0.984862  |
| H17 | -3.171687 | 4.036898  | -0.104398 |
| H18 | 0.721575  | 1.253365  | -0.022240 |
| C19 | 2.983484  | -1.647284 | 0.008401  |
| C20 | 4.401615  | -1.463746 | 0.019565  |
| C21 | 4.850083  | -0.187736 | 0.015910  |
| H22 | 5.094338  | -2.293078 | 0.030349  |
| H23 | 5.904973  | 0.054412  | 0.023870  |
| N24 | 2.161907  | -0.602214 | -0.004708 |

|     |           |           |           |
|-----|-----------|-----------|-----------|
| C25 | 2.641876  | 0.624138  | -0.008207 |
| O26 | 1.858948  | 1.624939  | -0.021035 |
| N27 | 3.995140  | 0.873745  | 0.002161  |
| C28 | 4.471739  | 2.257868  | -0.001706 |
| H29 | 4.119012  | 2.768326  | -0.897175 |
| H30 | 4.096499  | 2.780477  | 0.877419  |
| H31 | 5.560152  | 2.251362  | 0.012350  |
| N32 | 2.409016  | -2.848497 | 0.010485  |
| H33 | 2.946074  | -3.697142 | 0.019180  |
| H34 | 1.394068  | -2.872502 | 0.000623  |
| N35 | -2.724979 | -1.879442 | -0.006316 |
| H36 | -2.725379 | -2.890243 | 0.015506  |

|     |           |           |           |
|-----|-----------|-----------|-----------|
| H5  | 1.797731  | -2.172889 | 0.000095  |
| H6  | -0.666480 | -2.515625 | 0.000035  |
| N7  | 0.708089  | 1.036979  | 0.000003  |
| C8  | -0.567762 | 0.768610  | 0.000004  |
| O9  | -1.458002 | 1.731524  | 0.000044  |
| N10 | -1.094197 | -0.480105 | -0.000045 |
| C11 | -2.553944 | -0.679729 | -0.000030 |
| H12 | -2.986501 | -0.227107 | 0.890879  |
| H13 | -2.986747 | -0.224883 | -0.889673 |
| H14 | -2.749591 | -1.749529 | -0.001381 |
| N15 | 2.871515  | 0.317387  | -0.000041 |
| H16 | 3.583826  | -0.393745 | -0.000043 |
| H17 | 3.153534  | 1.285807  | -0.000087 |

**HG-9MG-[1MC + H<sub>02</sub>]<sup>+</sup>**

|     |           |           |           |
|-----|-----------|-----------|-----------|
| C1  | -1.428515 | -1.295894 | -0.018555 |
| C2  | -1.527477 | 0.138123  | -0.016885 |
| C3  | -3.917559 | -1.208515 | 0.003174  |
| C4  | -1.278335 | 2.265406  | -0.010215 |
| N5  | -0.586437 | 1.154911  | -0.022051 |
| N6  | -2.621152 | 2.052986  | 0.001352  |
| N7  | -4.001396 | 0.095483  | 0.003147  |
| C8  | -2.798290 | 0.698511  | -0.000776 |
| N9  | -5.043465 | -1.955888 | 0.047718  |
| H10 | -5.915533 | -1.461479 | -0.041213 |
| H11 | -5.037226 | -2.933580 | -0.184369 |
| O12 | -0.468459 | -2.043069 | -0.023633 |
| H13 | -0.853224 | 3.258393  | -0.010778 |
| C14 | -3.681337 | 3.047794  | 0.035383  |
| H15 | -4.392826 | 2.849946  | -0.765410 |
| H16 | -4.199166 | 3.009607  | 0.993886  |
| H17 | -3.239792 | 4.033416  | -0.103660 |
| H18 | 0.952956  | 1.367858  | -0.027602 |
| C19 | 2.954243  | -1.647623 | 0.009905  |
| C20 | 4.377674  | -1.510583 | 0.023666  |
| C21 | 4.872260  | -0.251854 | 0.019288  |
| H22 | 5.041486  | -2.363355 | 0.036722  |
| H23 | 5.934654  | -0.046328 | 0.028970  |
| N24 | 2.173066  | -0.565647 | -0.006005 |
| C25 | 2.705085  | 0.625841  | -0.009510 |
| O26 | 1.953547  | 1.674618  | -0.024720 |
| N27 | 4.055071  | 0.841831  | 0.002679  |
| C28 | 4.581315  | 2.210373  | -0.002141 |
| H29 | 4.248149  | 2.731407  | -0.898835 |
| H30 | 4.226903  | 2.745601  | 0.877873  |
| H31 | 5.668358  | 2.161903  | 0.011466  |
| N32 | 2.329777  | -2.817607 | 0.011865  |
| H33 | 2.829274  | -3.689389 | 0.023409  |
| H34 | 1.311139  | -2.792701 | 0.000476  |
| N35 | -2.720386 | -1.873194 | -0.007565 |
| H36 | -2.705804 | -2.883298 | 0.027904  |

**[1MC + H<sub>02</sub>]<sup>+</sup>**

|    |           |           |          |
|----|-----------|-----------|----------|
| H1 | -1.006457 | 2.585579  | 0.000027 |
| C2 | 1.580136  | 0.014747  | 0.000007 |
| C3 | 1.116731  | -1.333627 | 0.000059 |
| C4 | -0.220685 | -1.529939 | 0.000023 |

**Cartesian coordinates for the structures  
in Figure 6, optimized at  $\omega$ B97XD/  
6-311++ G(d,p).**

**HG-9MG·[1MC + H<sub>N3'</sub>]<sup>+</sup>·H<sub>2</sub>O**

|     |           |           |           |
|-----|-----------|-----------|-----------|
| C1  | -1.777697 | -0.937746 | -0.005328 |
| C2  | -1.278442 | 0.390486  | -0.005302 |
| C3  | -3.978472 | 0.163172  | 0.002102  |
| C4  | -0.102620 | 2.165701  | -0.007921 |
| N5  | 0.013760  | 0.863260  | -0.009586 |
| N6  | -1.407014 | 2.577187  | -0.004449 |
| N7  | -3.516124 | 1.392247  | 0.003203  |
| C8  | -2.173796 | 1.444468  | -0.001130 |
| N9  | -5.304190 | -0.060244 | 0.005008  |
| H10 | -5.914301 | 0.738092  | 0.008417  |
| H11 | -5.678136 | -0.997803 | 0.004416  |
| O12 | -1.143207 | -1.993346 | -0.007765 |
| H13 | 0.727777  | 2.857017  | -0.010767 |
| C14 | -1.907602 | 3.941843  | 0.017940  |
| H15 | -2.634177 | 4.077032  | -0.782683 |
| H16 | -2.385912 | 4.149854  | 0.975425  |
| H17 | -1.072456 | 4.624967  | -0.129193 |
| H18 | 1.454378  | 0.036964  | -0.010075 |
| C19 | 2.604034  | -1.733772 | 0.002541  |
| C20 | 3.940983  | -2.224669 | 0.011456  |
| C21 | 4.948572  | -1.320475 | 0.010996  |
| H22 | 4.143715  | -3.284846 | 0.018803  |
| H23 | 5.985408  | -1.633482 | 0.017726  |
| N24 | 2.428935  | -0.398068 | -0.006172 |
| C25 | 3.445798  | 0.542832  | -0.006058 |
| O26 | 3.228461  | 1.728426  | -0.012801 |
| N27 | 4.738145  | 0.018226  | 0.002461  |
| C28 | 5.839205  | 0.983866  | 0.001561  |
| H29 | 5.781820  | 1.608146  | -0.889548 |
| H30 | 5.772357  | 1.620801  | 0.882966  |
| H31 | 6.781039  | 0.438605  | 0.010504  |
| N32 | 1.550265  | -2.525535 | 0.002556  |
| H33 | 1.694560  | -3.521781 | 0.009304  |
| H34 | 0.567229  | -2.193488 | -0.003234 |
| N35 | -3.171487 | -0.953200 | -0.001526 |
| H36 | -3.617140 | -1.869143 | -0.001163 |
| O37 | -5.257824 | -3.033611 | -0.000028 |
| H38 | -5.454630 | -3.578608 | 0.765393  |
| H39 | -5.456778 | -3.575422 | -0.767156 |

**H<sub>2</sub>O**

|    |          |           |           |
|----|----------|-----------|-----------|
| O1 | 0.000000 | 0.000000  | 0.116335  |
| H2 | 0.000000 | 0.760673  | -0.465340 |
| H3 | 0.000000 | -0.760673 | -0.465340 |

**TS\_PT3'·H<sub>2</sub>O**

|    |           |           |           |
|----|-----------|-----------|-----------|
| C1 | -1.785083 | -0.976575 | -0.004129 |
| C2 | -1.225724 | 0.332430  | -0.001548 |
| C3 | -3.928120 | 0.241407  | 0.001946  |
| C4 | 0.038644  | 2.078019  | -0.002182 |

|     |           |           |           |
|-----|-----------|-----------|-----------|
| N5  | 0.081027  | 0.765617  | -0.004614 |
| N6  | -1.238938 | 2.530473  | 0.001345  |
| N7  | -3.401961 | 1.447263  | 0.005373  |
| C8  | -2.061633 | 1.429437  | 0.002713  |
| N9  | -5.261130 | 0.087928  | 0.003056  |
| H10 | -5.830270 | 0.916307  | 0.005936  |
| H11 | -5.682616 | -0.829855 | -0.000968 |
| O12 | -1.201149 | -2.052903 | -0.007317 |
| H13 | 0.917559  | 2.705708  | -0.004517 |
| C14 | -1.683183 | 3.917042  | 0.021266  |
| H15 | -2.384281 | 4.084362  | -0.795397 |
| H16 | -2.174995 | 4.133825  | 0.969372  |
| H17 | -0.816200 | 4.564041  | -0.100164 |
| H18 | 1.131916  | 0.104130  | -0.006445 |
| C19 | 2.585731  | -1.776007 | 0.009232  |
| C20 | 3.941025  | -2.223692 | 0.019100  |
| C21 | 4.909913  | -1.280227 | 0.013590  |
| H22 | 4.186398  | -3.275205 | 0.030999  |
| H23 | 5.960796  | -1.542221 | 0.020076  |
| N24 | 2.321304  | -0.464712 | -0.003991 |
| C25 | 3.305665  | 0.492855  | -0.010212 |
| O26 | 3.053110  | 1.682664  | -0.023646 |
| N27 | 4.629114  | 0.045193  | 0.000141  |
| C28 | 5.678713  | 1.063323  | -0.014512 |
| H29 | 5.613029  | 1.651566  | -0.929658 |
| H30 | 5.559251  | 1.729699  | 0.838955  |
| H31 | 6.646622  | 0.567739  | 0.037175  |
| N32 | 1.575161  | -2.638391 | 0.013191  |
| H33 | 1.768506  | -3.625035 | 0.022407  |
| H34 | 0.592397  | -2.346003 | 0.004158  |
| N35 | -3.179467 | -0.914108 | -0.002350 |
| H36 | -3.673489 | -1.806004 | -0.004699 |
| O37 | -5.352717 | -2.880156 | -0.012822 |
| H38 | -5.571177 | -3.421617 | 0.749449  |
| H39 | -5.568848 | -3.411187 | -0.783061 |

**HG-[9MG + H<sub>N7</sub>]<sup>+</sup>·1MC·H<sub>2</sub>O**

|     |           |           |           |
|-----|-----------|-----------|-----------|
| C1  | -1.782766 | -0.984579 | -0.006760 |
| C2  | -1.253956 | 0.340897  | -0.005185 |
| C3  | -3.946962 | 0.203690  | 0.005124  |
| C4  | -0.012329 | 2.125139  | -0.008075 |
| N5  | 0.037013  | 0.811089  | -0.011089 |
| N6  | -1.295421 | 2.543657  | -0.001437 |
| N7  | -3.440767 | 1.420330  | 0.007429  |
| C8  | -2.102297 | 1.424723  | 0.001450  |
| N9  | -5.275917 | 0.030569  | 0.009670  |
| H10 | -5.858178 | 0.849995  | 0.014238  |
| H11 | -5.683413 | -0.893877 | 0.006671  |
| O12 | -1.175996 | -2.042513 | -0.011762 |
| H13 | 0.866047  | 2.753533  | -0.011583 |
| C14 | -1.770104 | 3.921663  | 0.019973  |
| H15 | -2.477009 | 4.070746  | -0.794941 |
| H16 | -2.264103 | 4.124362  | 0.969792  |
| H17 | -0.918329 | 4.587912  | -0.103500 |
| H18 | 0.949256  | 0.220173  | -0.014226 |
| C19 | 2.682742  | -1.798486 | 0.004738  |

|     |           |           |           |
|-----|-----------|-----------|-----------|
| C20 | 4.055063  | -2.196073 | 0.018641  |
| C21 | 4.981044  | -1.210177 | 0.018453  |
| H22 | 4.347562  | -3.235708 | 0.030157  |
| H23 | 6.043108  | -1.422327 | 0.028934  |
| N24 | 2.350241  | -0.510549 | -0.008386 |
| C25 | 3.289729  | 0.479671  | -0.010125 |
| O26 | 2.987594  | 1.664496  | -0.024441 |
| N27 | 4.636922  | 0.100840  | 0.006265  |
| C28 | 5.637457  | 1.165433  | -0.004225 |
| H29 | 5.561699  | 1.739397  | -0.927904 |
| H30 | 5.471313  | 1.836640  | 0.837579  |
| H31 | 6.626690  | 0.716702  | 0.071430  |
| N32 | 1.703652  | -2.706710 | 0.005061  |
| H33 | 1.924144  | -3.686856 | 0.014161  |
| H34 | 0.722965  | -2.430910 | -0.004206 |
| N35 | -3.180267 | -0.940014 | -0.001311 |
| H36 | -3.662306 | -1.839097 | -0.002587 |
| O37 | -5.314430 | -2.936060 | -0.006473 |
| H38 | -5.519470 | -3.482345 | 0.756224  |
| H39 | -5.521231 | -3.471608 | -0.776285 |

**TS\_PT7·H<sub>2</sub>O**

|     |           |           |           |
|-----|-----------|-----------|-----------|
| C1  | -1.342335 | -0.823438 | -0.005369 |
| C2  | -1.185283 | 0.609870  | -0.004392 |
| C3  | -3.770274 | -0.294137 | 0.004896  |
| C4  | -0.570960 | 2.676069  | -0.008820 |
| N5  | -0.087488 | 1.458042  | -0.010254 |
| N6  | -1.924138 | 2.693349  | -0.003905 |
| N7  | -3.623942 | 1.010214  | 0.006308  |
| C8  | -2.336078 | 1.386239  | 0.000815  |
| N9  | -4.999109 | -0.837530 | 0.009021  |
| H10 | -5.787829 | -0.215057 | 0.012502  |
| H11 | -5.128348 | -1.838815 | 0.005762  |
| O12 | -0.520949 | -1.720858 | -0.009984 |
| H13 | 0.027533  | 3.574635  | -0.012583 |
| C14 | -2.800152 | 3.853939  | 0.016247  |
| H15 | -3.545264 | 3.758195  | -0.772393 |
| H16 | -3.304841 | 3.924705  | 0.979877  |
| H17 | -2.202650 | 4.748702  | -0.151795 |
| H18 | 1.254042  | 1.389061  | -0.013235 |
| C19 | 2.934525  | -1.857194 | 0.005100  |
| C20 | 4.363661  | -1.921300 | 0.012044  |
| C21 | 5.025527  | -0.741732 | 0.009974  |
| H22 | 4.901872  | -2.858360 | 0.018781  |
| H23 | 6.106329  | -0.683788 | 0.014888  |
| N24 | 2.308118  | -0.684167 | -0.002871 |
| C25 | 2.992837  | 0.436249  | -0.004803 |
| O26 | 2.393045  | 1.561371  | -0.012785 |
| N27 | 4.367032  | 0.452362  | 0.001801  |
| C28 | 5.075461  | 1.733544  | -0.002140 |
| H29 | 4.818991  | 2.295838  | -0.899443 |
| H30 | 4.793944  | 2.314588  | 0.875369  |
| H31 | 6.146285  | 1.539085  | 0.015346  |
| N32 | 2.156274  | -2.936016 | 0.006063  |
| H33 | 2.534521  | -3.866345 | 0.011565  |
| H34 | 1.151713  | -2.773936 | 0.000367  |

|     |           |           |           |
|-----|-----------|-----------|-----------|
| N35 | -2.710110 | -1.160923 | -0.000062 |
| H36 | -2.907396 | -2.159267 | -0.000924 |
| O37 | -4.243273 | -3.704047 | -0.007685 |
| H38 | -4.308107 | -4.284609 | 0.754012  |
| H39 | -4.309401 | -4.272330 | -0.778492 |

**HG-9MG·[1MC + H<sub>2</sub>O]<sup>+</sup>·H<sub>2</sub>O**

|     |           |           |           |
|-----|-----------|-----------|-----------|
| C1  | -1.343645 | -0.807424 | -0.011459 |
| C2  | -1.200072 | 0.625001  | -0.008672 |
| C3  | -3.776490 | -0.308915 | 0.009548  |
| C4  | -0.604912 | 2.686881  | -0.011867 |
| N5  | -0.105345 | 1.477244  | -0.017762 |
| N6  | -1.962858 | 2.696439  | -0.001104 |
| N7  | -3.645878 | 0.996043  | 0.013024  |
| C8  | -2.361411 | 1.387895  | 0.002884  |
| N9  | -4.999399 | -0.868122 | 0.018189  |
| H10 | -5.795311 | -0.255076 | 0.023753  |
| H11 | -5.116590 | -1.870624 | 0.009628  |
| O12 | -0.512453 | -1.699567 | -0.020951 |
| H13 | -0.022509 | 3.596564  | -0.016631 |
| C14 | -2.846689 | 3.849755  | 0.025289  |
| H15 | -3.594730 | 3.752178  | -0.760563 |
| H16 | -3.348577 | 3.916506  | 0.990874  |
| H17 | -2.256339 | 4.749349  | -0.143107 |
| H18 | 1.398182  | 1.440901  | -0.025150 |
| C19 | 2.918938  | -1.846112 | 0.011673  |
| C20 | 4.346586  | -1.936897 | 0.023939  |
| C21 | 5.032888  | -0.771371 | 0.018582  |
| H22 | 4.866519  | -2.884198 | 0.037154  |
| H23 | 6.114485  | -0.735207 | 0.026891  |
| N24 | 2.318980  | -0.655746 | -0.003538 |
| C25 | 3.029864  | 0.439642  | -0.008594 |
| O26 | 2.452498  | 1.589548  | -0.024681 |
| N27 | 4.398914  | 0.437348  | 0.002753  |
| C28 | 5.133879  | 1.705058  | -0.008633 |
| H29 | 4.908359  | 2.255758  | -0.921302 |
| H30 | 4.846598  | 2.306050  | 0.853180  |
| H31 | 6.199508  | 1.488462  | 0.035369  |
| N32 | 2.114854  | -2.901720 | 0.014267  |
| H33 | 2.469275  | -3.841629 | 0.024232  |
| H34 | 1.112748  | -2.710568 | 0.002970  |
| N35 | -2.705899 | -1.163177 | -0.001462 |
| H36 | -2.890635 | -2.163570 | -0.003982 |
| O37 | -4.215054 | -3.728518 | -0.017717 |
| H38 | -4.277930 | -4.314896 | 0.739579  |
| H39 | -4.280198 | -4.290935 | -0.792815 |

**TS1**

|    |          |           |          |
|----|----------|-----------|----------|
| C1 | 2.469365 | -1.375298 | 0.013790 |
| C2 | 2.037795 | -0.022571 | 0.016082 |
| C3 | 4.729409 | -0.376023 | 0.014320 |
| C4 | 0.949386 | 1.802668  | 0.011507 |
| N5 | 0.770251 | 0.508468  | 0.013981 |
| N6 | 2.273399 | 2.153445  | 0.013014 |
| N7 | 4.324857 | 0.867388  | 0.019880 |
| C8 | 2.982924 | 0.986096  | 0.013398 |

|     |           |           |           |
|-----|-----------|-----------|-----------|
| N9  | 6.053759  | -0.650808 | -0.026074 |
| H10 | 6.675498  | 0.134227  | 0.075457  |
| H11 | 6.410344  | -1.557548 | 0.220824  |
| O12 | 1.797710  | -2.400577 | 0.008871  |
| H13 | 0.152635  | 2.532507  | 0.010720  |
| C14 | 2.837727  | 3.493028  | -0.008774 |
| H15 | 3.570875  | 3.593682  | 0.790914  |
| H16 | 3.323057  | 3.680666  | -0.966968 |
| H17 | 2.035501  | 4.213944  | 0.141158  |
| H18 | -0.779620 | -0.266729 | 0.007352  |
| C19 | -1.998771 | -1.972249 | -0.008382 |
| C20 | -3.350427 | -2.394244 | -0.032949 |
| C21 | -4.309237 | -1.422312 | -0.026842 |
| H22 | -3.604055 | -3.444006 | -0.042361 |
| H23 | -5.360113 | -1.698177 | -0.035169 |
| N24 | -1.760288 | -0.644632 | 0.004833  |
| C25 | -2.752751 | 0.330991  | -0.007243 |
| O26 | -2.447097 | 1.513866  | -0.038174 |
| N27 | -4.055297 | -0.100882 | 0.010817  |
| C28 | -5.237379 | 1.572337  | -1.144977 |
| H29 | -6.153252 | 2.128520  | -1.027983 |
| H30 | -4.281807 | 2.072674  | -1.023788 |
| H31 | -5.282631 | 0.689914  | -1.764997 |
| N32 | -0.975470 | -2.812911 | -0.002490 |
| H33 | -1.161185 | -3.801574 | -0.013952 |
| H34 | 0.012034  | -2.522795 | 0.006992  |
| N35 | 3.870543  | -1.451711 | 0.011749  |
| H36 | 4.239683  | -2.392028 | -0.030904 |
| O37 | -5.918647 | 1.473349  | 0.988331  |
| H38 | -5.165811 | 0.868712  | 1.108286  |
| H39 | -5.747394 | 2.261873  | 1.512649  |

**HG-9MG· [IHC + H<sub>N3'</sub>]<sup>+</sup>**

|     |           |           |           |
|-----|-----------|-----------|-----------|
| C1  | -1.515359 | -1.468647 | -0.005751 |
| C2  | -1.334012 | -0.062813 | -0.008362 |
| C3  | -3.915624 | -0.893447 | 0.001647  |
| C4  | -0.589678 | 1.930263  | -0.008703 |
| N5  | -0.182341 | 0.687433  | -0.011824 |
| N6  | -1.953231 | 2.037200  | -0.004727 |
| N7  | -3.740638 | 0.403312  | -0.003357 |
| C8  | -2.443651 | 0.761555  | -0.002132 |
| N9  | -5.166715 | -1.400614 | 0.040342  |
| H10 | -5.923447 | -0.742464 | -0.043755 |
| H11 | -5.358679 | -2.365093 | -0.165945 |
| O12 | -0.665201 | -2.355357 | -0.004428 |
| H13 | 0.064715  | 2.790247  | -0.010695 |
| C14 | -2.745742 | 3.257271  | 0.017253  |
| H15 | -3.501684 | 3.213776  | -0.765837 |
| H16 | -3.234285 | 3.370961  | 0.985221  |
| H17 | -2.085992 | 4.104898  | -0.161045 |
| H18 | 1.407909  | 0.191049  | -0.010052 |
| C19 | 2.938637  | -1.266089 | 0.001106  |
| C20 | 4.356999  | -1.444671 | 0.009043  |
| C21 | 5.133635  | -0.339138 | 0.010451  |
| H22 | 4.790171  | -2.433324 | 0.014318  |
| H23 | 6.214925  | -0.392649 | 0.016832  |

|     |           |           |           |
|-----|-----------|-----------|-----------|
| N24 | 2.455108  | -0.007582 | -0.005514 |
| C25 | 3.226831  | 1.145621  | -0.003812 |
| O26 | 2.752615  | 2.250368  | -0.008813 |
| N27 | 4.595649  | 0.906456  | 0.004242  |
| N28 | 2.098247  | -2.279545 | 0.000140  |
| H29 | 2.466872  | -3.216718 | 0.005571  |
| H30 | 1.067290  | -2.181077 | -0.003524 |
| N31 | -2.876219 | -1.797893 | 0.000400  |
| H32 | -3.069610 | -2.789772 | 0.036870  |
| H33 | 5.181275  | 1.729279  | 0.005619  |

**CH<sub>3</sub>OH**

|    |           |           |           |
|----|-----------|-----------|-----------|
| C1 | 0.661363  | -0.020245 | 0.000001  |
| H2 | 1.082520  | 0.985326  | 0.000098  |
| H3 | 1.024454  | -0.544778 | 0.892371  |
| H4 | 1.024458  | -0.544594 | -0.892477 |
| O5 | -0.744663 | 0.121755  | 0.000002  |
| H6 | -1.142307 | -0.748524 | -0.000012 |

**[IHC+H<sub>N3'</sub>]<sup>+</sup>**

|     |           |           |           |
|-----|-----------|-----------|-----------|
| H1  | -0.110859 | -1.970930 | 0.000105  |
| C2  | -1.189551 | -0.208415 | 0.000000  |
| C3  | -1.046724 | 1.201662  | -0.000082 |
| C4  | 0.209887  | 1.714206  | -0.000013 |
| H5  | -1.912983 | 1.845615  | -0.000168 |
| H6  | 0.392747  | 2.781694  | -0.000034 |
| N7  | -0.065652 | -0.958299 | 0.000109  |
| C8  | 1.254533  | -0.466223 | 0.000006  |
| O9  | 2.204654  | -1.183070 | -0.000129 |
| N10 | 1.304810  | 0.922534  | 0.000118  |
| N11 | -2.370599 | -0.805982 | -0.000002 |
| H12 | -3.216142 | -0.257133 | -0.000075 |
| H13 | -2.474631 | -1.809309 | 0.000047  |
| H14 | 2.235858  | 1.319477  | 0.000110  |

**TS1\_PT3'**

|     |           |           |           |
|-----|-----------|-----------|-----------|
| C1  | -1.521204 | -1.513611 | 0.000036  |
| C2  | -1.287704 | -0.111067 | 0.000410  |
| C3  | -3.897837 | -0.829645 | -0.000182 |
| C4  | -0.466004 | 1.880728  | -0.004138 |
| N5  | -0.118941 | 0.614049  | -0.002004 |
| N6  | -1.813946 | 2.022189  | -0.004528 |
| N7  | -3.664223 | 0.461286  | -0.000037 |
| C8  | -2.355929 | 0.760278  | -0.000274 |
| N9  | -5.166769 | -1.274106 | -0.000795 |
| H10 | -5.902899 | -0.588520 | 0.000449  |
| H11 | -5.410348 | -2.248169 | 0.000483  |
| O12 | -0.709215 | -2.425744 | -0.000487 |
| H13 | 0.243223  | 2.695499  | -0.006530 |
| C14 | -2.567644 | 3.269552  | 0.009142  |
| H15 | -3.307585 | 3.252186  | -0.789659 |
| H16 | -3.070971 | 3.387948  | 0.968431  |
| H17 | -1.876081 | 4.095187  | -0.148519 |
| H18 | 1.050359  | 0.212386  | -0.002806 |
| C19 | 2.923431  | -1.270188 | 0.000454  |
| C20 | 4.351465  | -1.389484 | 0.003396  |

|     |           |           |           |
|-----|-----------|-----------|-----------|
| C21 | 5.070971  | -0.247345 | 0.003460  |
| H22 | 4.832702  | -2.356020 | 0.005630  |
| H23 | 6.153510  | -0.237443 | 0.005765  |
| N24 | 2.345979  | -0.062456 | -0.002317 |
| C25 | 3.072418  | 1.104655  | -0.002240 |
| O26 | 2.554270  | 2.202239  | -0.004550 |
| N27 | 4.456158  | 0.961291  | 0.000738  |
| N28 | 2.152124  | -2.350257 | 0.000541  |
| H29 | 2.575240  | -3.262737 | 0.002878  |
| H30 | 1.129571  | -2.301417 | -0.000785 |
| N31 | -2.899044 | -1.778094 | 0.000323  |
| H32 | -3.134666 | -2.761762 | 0.000322  |
| H33 | 4.986364  | 1.820349  | 0.000791  |

**HG-[9MG + H<sub>N7</sub>]<sup>+</sup>·1HC**

|     |           |           |           |
|-----|-----------|-----------|-----------|
| C1  | -1.517615 | -1.520407 | 0.000157  |
| C2  | -1.316864 | -0.109500 | 0.000671  |
| C3  | -3.907617 | -0.869326 | 0.000044  |
| C4  | -0.524620 | 1.912807  | -0.004398 |
| N5  | -0.170791 | 0.646224  | -0.002029 |
| N6  | -1.870040 | 2.021846  | -0.004443 |
| N7  | -3.695220 | 0.427136  | 0.000269  |
| C8  | -2.393560 | 0.746774  | 0.000017  |
| N9  | -5.168624 | -1.331850 | -0.000523 |
| H10 | -5.915417 | -0.657571 | 0.000597  |
| H11 | -5.397782 | -2.309678 | -0.000511 |
| O12 | -0.687946 | -2.410053 | -0.000525 |
| H13 | 0.184333  | 2.727889  | -0.006937 |
| C14 | -2.649680 | 3.254868  | 0.008533  |
| H15 | -3.388270 | 3.219699  | -0.790721 |
| H16 | -3.155155 | 3.360566  | 0.967940  |
| H17 | -1.975414 | 4.094511  | -0.149041 |
| H18 | 0.854740  | 0.280229  | -0.003204 |
| C19 | 3.022474  | -1.265338 | 0.000163  |
| C20 | 4.455686  | -1.328923 | 0.003398  |
| C21 | 5.121467  | -0.154461 | 0.003758  |
| H22 | 4.980776  | -2.272580 | 0.005605  |
| H23 | 6.202221  | -0.091507 | 0.006302  |
| N24 | 2.383029  | -0.097443 | -0.002635 |
| C25 | 3.056440  | 1.091653  | -0.002179 |
| O26 | 2.489504  | 2.171986  | -0.004392 |
| N27 | 4.447711  | 1.022771  | 0.001084  |
| N28 | 2.294389  | -2.382862 | 0.000009  |
| H29 | 2.743889  | -3.281800 | 0.002396  |
| H30 | 1.276892  | -2.352164 | -0.001353 |
| N31 | -2.894507 | -1.802776 | 0.000470  |
| H32 | -3.116669 | -2.789780 | 0.000467  |
| H33 | 4.935081  | 1.906518  | 0.001400  |

**1HC**

|    |           |           |           |
|----|-----------|-----------|-----------|
| C1 | 1.182095  | -0.526650 | -0.000084 |
| N2 | -0.082021 | -1.047475 | -0.000685 |
| C3 | -1.125659 | -0.253079 | 0.000556  |
| C4 | 0.202000  | 1.705764  | -0.000320 |
| N5 | 1.277902  | 0.888358  | -0.000375 |
| H6 | 0.396535  | 2.771386  | -0.000437 |

|     |           |           |           |
|-----|-----------|-----------|-----------|
| O7  | 2.206651  | -1.172263 | -0.000093 |
| N8  | -2.346150 | -0.837635 | 0.007967  |
| H9  | -2.389356 | -1.842139 | -0.018633 |
| H10 | -3.192401 | -0.301154 | -0.031945 |
| C11 | -1.043632 | 1.183690  | 0.000142  |
| H12 | -1.921519 | 1.813417  | 0.002148  |
| H13 | 2.216585  | 1.255509  | -0.000506 |

**TS1\_PT7**

|     |           |           |           |
|-----|-----------|-----------|-----------|
| C1  | -1.047162 | -1.290970 | -0.007535 |
| C2  | -1.272702 | 0.131706  | -0.003616 |
| C3  | -3.537138 | -1.413958 | 0.003496  |
| C4  | -1.218586 | 2.286856  | -0.008429 |
| N5  | -0.435049 | 1.235794  | -0.009365 |
| N6  | -2.528675 | 1.950215  | -0.003971 |
| N7  | -3.730758 | -0.119818 | 0.009574  |
| C8  | -2.585028 | 0.581776  | 0.000527  |
| N9  | -4.595683 | -2.248642 | -0.018599 |
| H10 | -5.509717 | -1.834995 | 0.055582  |
| H11 | -4.506520 | -3.238207 | 0.128078  |
| O12 | -0.027843 | -1.948699 | -0.015891 |
| H13 | -0.872443 | 3.309459  | -0.011918 |
| C14 | -3.677814 | 2.843726  | 0.014870  |
| H15 | -4.358827 | 2.574329  | -0.791189 |
| H16 | -4.197059 | 2.759665  | 0.969372  |
| H17 | -3.328799 | 3.865379  | -0.125916 |
| H18 | 0.859042  | 1.502048  | -0.010249 |
| C19 | 3.368045  | -1.190067 | 0.004315  |
| C20 | 4.768178  | -0.873739 | 0.010140  |
| C21 | 5.094736  | 0.436718  | 0.008840  |
| H22 | 5.531583  | -1.638219 | 0.015104  |
| H23 | 6.115959  | 0.793946  | 0.012754  |
| N24 | 2.441660  | -0.233178 | -0.001028 |
| C25 | 2.798161  | 1.031442  | -0.002505 |
| O26 | 1.933035  | 1.961434  | -0.008384 |
| N27 | 4.120736  | 1.391035  | 0.002296  |
| N28 | 2.913812  | -2.438449 | 0.003973  |
| H29 | 3.529171  | -3.232671 | 0.006231  |
| H30 | 1.904505  | -2.557797 | -0.002616 |
| N31 | -2.287924 | -1.974215 | -0.003240 |
| H32 | -2.186933 | -2.979791 | -0.030076 |
| H33 | 4.347524  | 2.374845  | 0.000940  |

**HG-9MG·[1HC + H<sub>O2</sub>]<sup>+</sup>**

|     |           |           |           |
|-----|-----------|-----------|-----------|
| C1  | -1.049931 | -1.270708 | -0.012575 |
| C2  | -1.286180 | 0.147766  | -0.012303 |
| C3  | -3.536147 | -1.422328 | 0.000069  |
| C4  | -1.245843 | 2.291245  | -0.006186 |
| N5  | -0.449490 | 1.252564  | -0.014851 |
| N6  | -2.560257 | 1.948803  | 0.000784  |
| N7  | -3.744517 | -0.132246 | -0.000859 |
| C8  | -2.605221 | 0.583144  | -0.001133 |
| N9  | -4.585392 | -2.273162 | 0.039618  |
| H10 | -5.500825 | -1.864596 | -0.048588 |
| H11 | -4.485687 | -3.248694 | -0.179438 |
| O12 | -0.022702 | -1.922582 | -0.013493 |

|     |           |           |           |
|-----|-----------|-----------|-----------|
| H13 | -0.918733 | 3.320712  | -0.006016 |
| C14 | -3.712994 | 2.835489  | 0.030010  |
| H15 | -4.399530 | 2.566019  | -0.771538 |
| H16 | -4.226165 | 2.748687  | 0.987785  |
| H17 | -3.370387 | 3.859404  | -0.111285 |
| H18 | 1.028897  | 1.604754  | -0.021147 |
| C19 | 3.347721  | -1.197194 | 0.008769  |
| C20 | 4.755607  | -0.917872 | 0.017202  |
| C21 | 5.120526  | 0.382533  | 0.011291  |
| H22 | 5.498213  | -1.702661 | 0.027654  |
| H23 | 6.151476  | 0.710059  | 0.016689  |
| N24 | 2.450223  | -0.207343 | -0.003991 |
| C25 | 2.850384  | 1.034083  | -0.009106 |
| O26 | 2.008743  | 2.004565  | -0.021041 |
| N27 | 4.173933  | 1.366044  | -0.002055 |
| N28 | 2.850033  | -2.424466 | 0.012789  |
| H29 | 3.436577  | -3.240602 | 0.021790  |
| H30 | 1.833717  | -2.504173 | 0.005166  |
| N31 | -2.280644 | -1.969045 | -0.006232 |
| H32 | -2.169298 | -2.973128 | 0.028792  |
| H33 | 4.428677  | 2.343366  | -0.006252 |

**[1HC + H<sub>02</sub>]<sup>+</sup>**

|     |           |           |           |
|-----|-----------|-----------|-----------|
| H1  | -2.089659 | -1.968411 | 0.000569  |
| C2  | 1.174634  | -0.276084 | 0.000006  |
| C3  | 1.132634  | 1.154224  | 0.000002  |
| C4  | -0.083806 | 1.739396  | 0.000000  |
| H5  | 2.034558  | 1.749616  | -0.000018 |
| H6  | -0.234790 | 2.810440  | 0.000021  |
| N7  | 0.043146  | -1.007945 | -0.000002 |
| C8  | -1.096603 | -0.380217 | -0.000004 |
| O9  | -2.240097 | -1.013839 | -0.000089 |
| N10 | -1.209623 | 0.967405  | 0.000024  |
| N11 | 2.319158  | -0.940379 | 0.000000  |
| H12 | 3.209072  | -0.469059 | -0.000007 |
| H13 | 2.305499  | -1.949562 | -0.000068 |
| H14 | -2.133829 | 1.380201  | 0.000034  |

**TS2**

|     |           |           |           |
|-----|-----------|-----------|-----------|
| C1  | -1.477136 | -1.910796 | -0.016218 |
| C2  | -1.341216 | -0.503290 | -0.055604 |
| C3  | -3.893666 | -1.414520 | 0.028274  |
| C4  | -0.697014 | 1.518397  | -0.100654 |
| N5  | -0.218856 | 0.288702  | -0.102952 |
| N6  | -2.056334 | 1.597905  | -0.036755 |
| N7  | -3.762823 | -0.117378 | -0.007958 |
| C8  | -2.469464 | 0.301867  | -0.022199 |
| N9  | -5.129383 | -1.974870 | 0.111732  |
| H10 | -5.904223 | -1.339580 | 0.016899  |
| H11 | -5.283823 | -2.921072 | -0.192284 |
| O12 | -0.602956 | -2.777287 | -0.010387 |
| H13 | -0.054444 | 2.387917  | -0.130559 |
| C14 | -3.685967 | 2.927041  | -1.034909 |
| H15 | -4.263529 | 2.031347  | -0.835156 |
| H16 | -4.170858 | 3.880814  | -0.903718 |
| H17 | -2.880010 | 2.867238  | -1.749581 |

|     |           |           |           |
|-----|-----------|-----------|-----------|
| H18 | 1.350771  | -0.097778 | -0.084375 |
| C19 | 2.940843  | -1.499201 | 0.041436  |
| C20 | 4.358776  | -1.619962 | 0.112861  |
| C21 | 5.093403  | -0.483488 | 0.091613  |
| H22 | 4.831894  | -2.587432 | 0.185629  |
| H23 | 6.174766  | -0.510660 | 0.145531  |
| N24 | 2.418669  | -0.261434 | -0.047627 |
| C25 | 3.153466  | 0.911514  | -0.070083 |
| O26 | 2.636661  | 1.998468  | -0.147890 |
| N27 | 4.537808  | 0.749554  | 0.004736  |
| C28 | 5.345221  | 1.970291  | -0.025336 |
| H29 | 5.206289  | 2.483124  | -0.976870 |
| H30 | 5.036900  | 2.634703  | 0.780822  |
| H31 | 6.392060  | 1.699860  | 0.099647  |
| N32 | 2.137013  | -2.544427 | 0.059421  |
| H33 | 2.541693  | -3.463465 | 0.129341  |
| H34 | 1.102787  | -2.491918 | 0.016134  |
| N35 | -2.826868 | -2.283863 | 0.031125  |
| H36 | -2.987472 | -3.277898 | 0.120024  |
| O37 | -3.412722 | 3.546214  | 1.061397  |
| H38 | -2.754300 | 2.827668  | 1.106582  |
| H39 | -2.964434 | 4.371533  | 1.269823  |

**HG-9HG·[1MC + H<sub>N3</sub>]<sup>+</sup>**

|     |           |           |           |
|-----|-----------|-----------|-----------|
| C1  | -2.167469 | 1.101560  | 0.009685  |
| C2  | -1.788859 | -0.265856 | 0.008087  |
| C3  | -4.462369 | 0.192620  | -0.004542 |
| C4  | -0.755503 | -2.130156 | 0.001356  |
| N5  | -0.538430 | -0.843249 | 0.010122  |
| N6  | -2.092994 | -2.423221 | -0.006577 |
| N7  | -4.104788 | -1.066965 | -0.003989 |
| C8  | -2.772019 | -1.237028 | -0.002834 |
| N9  | -5.771737 | 0.514053  | -0.039227 |
| H10 | -6.430138 | -0.243937 | 0.028888  |
| H11 | -6.102914 | 1.446287  | 0.135045  |
| O12 | -1.452557 | 2.098943  | 0.012874  |
| H13 | 0.016269  | -2.885316 | 0.000387  |
| H14 | 0.988374  | -0.109296 | 0.010386  |
| C15 | 2.279861  | 1.555139  | -0.000605 |
| C16 | 3.653545  | 1.925818  | -0.009950 |
| C17 | 4.578493  | 0.936591  | -0.013556 |
| H18 | 3.948835  | 2.964050  | -0.015290 |
| H19 | 5.638676  | 1.157774  | -0.021025 |
| N20 | 1.989206  | 0.239253  | 0.004724  |
| C21 | 2.920308  | -0.788550 | 0.004563  |
| O22 | 2.596849  | -1.949204 | 0.014545  |
| N23 | 4.252500  | -0.378622 | -0.008949 |
| C24 | 5.266971  | -1.435979 | -0.001318 |
| H25 | 5.204399  | -2.002877 | 0.927327  |
| H26 | 5.098829  | -2.110581 | -0.839566 |
| H27 | 6.248974  | -0.975278 | -0.088942 |
| N28 | 1.298917  | 2.436086  | 0.002701  |
| H29 | 1.526566  | 3.416771  | -0.001375 |
| H30 | 0.295863  | 2.186685  | 0.008230  |
| N31 | -3.561631 | 1.234711  | 0.002746  |
| H32 | -3.893100 | 2.189683  | -0.024777 |

H33 -2.510019 -3.341162 -0.014799

### 9HG

C1 -0.214456 1.465217 0.002979  
 C2 0.851208 0.500129 0.008533  
 C3 -1.664190 -0.566008 -0.003477  
 C4 2.704126 -0.525479 0.000789  
 N5 2.216413 0.678757 0.008193  
 N6 1.726507 -1.496818 -0.004192  
 N7 -0.693379 -1.433826 0.006510  
 C8 0.528968 -0.845848 -0.000297  
 N9 -2.962528 -1.001285 -0.062101  
 H10 -3.065027 -1.991322 0.094689  
 H11 -3.675459 -0.428924 0.359929  
 O12 -0.192783 2.672759 -0.003369  
 H13 3.754117 -0.777742 -0.001335  
 N14 -1.471470 0.786868 -0.004051  
 H15 -2.265468 1.407327 -0.076555  
 H16 1.851361 -2.495349 -0.011455

### TS2\_PT3'

C1 -2.159420 1.151336 0.004005  
 C2 -1.721547 -0.204048 0.002459  
 C3 -4.409341 0.121870 -0.003580  
 C4 -0.600355 -2.054292 0.002189  
 N5 -0.456683 -0.751289 0.004789  
 N6 -1.915168 -2.382690 -0.001749  
 N7 -3.985740 -1.120945 -0.004811  
 C8 -2.650431 -1.221852 -0.001639  
 N9 -5.729205 0.369546 -0.006861  
 H10 -6.354075 -0.419072 -0.009308  
 H11 -6.116657 1.296017 -0.004505  
 O12 -1.492186 2.171283 0.007562  
 H13 0.226150 -2.749158 0.003217  
 H14 0.600612 -0.190576 0.005916  
 C15 2.288717 1.578707 0.000691  
 C16 3.681794 1.886119 -0.005481  
 C17 4.548469 0.847650 -0.009167  
 H18 4.035851 2.906358 -0.008272  
 H19 5.620711 0.999821 -0.014465  
 N20 1.886051 0.304286 0.003688  
 C21 2.768178 -0.746347 0.002997  
 O22 2.393201 -1.905744 0.010009  
 N23 4.130970 -0.441323 -0.007149  
 C24 5.069187 -1.563578 -0.001978  
 H25 4.955798 -2.138539 0.916929  
 H26 4.867602 -2.215643 -0.850852  
 H27 6.082284 -1.171024 -0.070162  
 N28 1.372490 2.543697 0.003278  
 H29 1.662854 3.506207 0.001201  
 H30 0.370619 2.348423 0.006690  
 N31 -3.562154 1.207514 0.000664  
 H32 -3.940785 2.145639 0.001414  
 H33 -2.294514 -3.317747 -0.004292

### HG-[9HG + H<sub>N7</sub>]<sup>+</sup>·1MC

C1 -2.158050 1.156165 0.001479  
 C2 -1.739650 -0.207281 0.000764  
 C3 -4.419168 0.145123 -0.001104  
 C4 -0.632587 -2.078421 0.000399  
 N5 -0.485730 -0.774834 0.001474  
 N6 -1.948891 -2.387106 -0.000991  
 N7 -4.007919 -1.103169 -0.001772  
 C8 -2.674870 -1.217012 -0.000769  
 N9 -5.735913 0.403853 -0.002034  
 H10 -6.367796 -0.379344 -0.002916  
 H11 -6.115654 1.333655 -0.001029  
 O12 -1.477661 2.163979 0.002765  
 H13 0.194048 -2.773321 0.000666  
 H14 0.487374 -0.246395 0.002129  
 C15 2.349153 1.594202 0.000032  
 C16 3.750355 1.867433 -0.002316  
 C17 4.586209 0.803707 -0.003214  
 H18 4.134597 2.876818 -0.003585  
 H19 5.662606 0.923355 -0.005096  
 N20 1.904952 0.338397 0.001464  
 C21 2.755410 -0.731285 0.001218  
 O22 2.347758 -1.883890 0.003507  
 N23 4.128808 -0.472099 -0.002013  
 C24 5.031579 -1.621946 -0.000263  
 H25 4.865136 -2.222179 0.893854  
 H26 4.843817 -2.240795 -0.877120  
 H27 6.058493 -1.260542 -0.016669  
 N28 1.455324 2.585406 0.000769  
 H29 1.762403 3.542264 -0.000164  
 H30 0.454666 2.400716 0.002211  
 N31 -3.561985 1.223114 0.000434  
 H32 -3.933047 2.164386 0.000857  
 H33 -2.338228 -3.318357 -0.001991

### [9HG + H<sub>N7</sub>]<sup>+</sup>

C1 -0.254825 1.467141 0.000049  
 C2 0.783781 0.471729 0.000022  
 C3 -1.716851 -0.544240 0.000060  
 C4 2.682189 -0.635321 -0.000102  
 N5 2.158740 0.578705 -0.000098  
 N6 1.685991 -1.531529 0.000026  
 N7 -0.734678 -1.428092 0.000215  
 C8 0.472311 -0.865769 0.000106  
 N9 -2.980226 -0.979495 -0.000368  
 H10 -3.136298 -1.974278 0.000442  
 H11 -3.775597 -0.364909 0.000135  
 O12 -0.143762 2.663637 0.000042  
 H13 3.734855 -0.867588 -0.000212  
 H14 2.679649 1.446474 -0.000144  
 N15 -1.508698 0.814562 0.000058  
 H16 -2.299171 1.447378 -0.000148  
 H17 1.799121 -2.536472 -0.000046



**TS2\_PT7**

|     |           |           |           |
|-----|-----------|-----------|-----------|
| C1  | -1.734214 | -0.993244 | -0.004620 |
| C2  | -1.680945 | 0.448123  | -0.002830 |
| C3  | -4.201552 | -0.629217 | 0.000927  |
| C4  | -1.197076 | 2.559157  | 0.001177  |
| N5  | -0.644995 | 1.372316  | -0.002623 |
| N6  | -2.546103 | 2.471284  | 0.003570  |
| N7  | -4.138418 | 0.679561  | 0.001396  |
| C8  | -2.880811 | 1.142536  | 0.001283  |
| N9  | -5.401428 | -1.236533 | 0.014047  |
| H10 | -6.220662 | -0.653363 | -0.011016 |
| H11 | -5.512681 | -2.232279 | -0.050414 |
| O12 | -0.860800 | -1.831620 | -0.006279 |
| H13 | -0.653020 | 3.490495  | 0.002304  |
| H14 | 0.610234  | 1.360372  | -0.004268 |
| C15 | 2.633485  | -1.726115 | 0.001704  |
| C16 | 4.062414  | -1.672718 | 0.004273  |
| C17 | 4.624667  | -0.442835 | 0.003450  |
| H18 | 4.675556  | -2.562560 | 0.006686  |
| H19 | 5.697111  | -0.296272 | 0.005219  |
| N20 | 1.908871  | -0.612297 | -0.001171 |
| C21 | 2.497574  | 0.568179  | -0.001808 |
| O22 | 1.808870  | 1.632934  | -0.004424 |
| N23 | 3.869172  | 0.691488  | 0.000408  |
| C24 | 4.470287  | 2.025915  | -0.000598 |
| H25 | 4.157681  | 2.572528  | -0.889671 |
| H26 | 4.153614  | 2.575664  | 0.885086  |
| H27 | 5.553519  | 1.918800  | 0.002116  |
| N28 | 1.954726  | -2.872475 | 0.001975  |
| H29 | 2.414202  | -3.765522 | 0.003988  |
| H30 | 0.942432  | -2.807332 | -0.000419 |
| N31 | -3.084966 | -1.421634 | -0.002712 |
| H32 | -3.180359 | -2.428199 | 0.007098  |
| H33 | -3.203177 | 3.236517  | 0.006939  |

|     |           |           |           |
|-----|-----------|-----------|-----------|
| C21 | -2.565935 | 0.562992  | 0.004880  |
| O22 | -1.917311 | 1.680269  | 0.012641  |
| N23 | -3.929341 | 0.651542  | -0.004504 |
| C24 | -4.582763 | 1.964289  | -0.003988 |
| H25 | -4.306890 | 2.514616  | 0.894763  |
| H26 | -4.274948 | 2.530541  | -0.882091 |
| H27 | -5.660156 | 1.813063  | -0.025166 |
| N28 | -1.866684 | -2.828513 | -0.000188 |
| H29 | -2.281979 | -3.743544 | -0.006100 |
| H30 | -0.854981 | -2.708704 | 0.006577  |
| N31 | 3.079954  | -1.417660 | 0.004755  |
| H32 | 3.156038  | -2.425167 | -0.026092 |
| H33 | 3.281692  | 3.234996  | -0.017161 |

**HG-9HG·[1MC+H<sub>2</sub>O]<sup>+</sup>**

|     |           |           |           |
|-----|-----------|-----------|-----------|
| C1  | 1.741666  | -0.958324 | 0.012545  |
| C2  | 1.711154  | 0.479713  | 0.009361  |
| C3  | 4.212665  | -0.647717 | -0.005232 |
| C4  | 1.257524  | 2.576870  | 0.000903  |
| N5  | 0.677933  | 1.406725  | 0.011098  |
| N6  | 2.614929  | 2.478989  | -0.007646 |
| N7  | 4.177993  | 0.659197  | -0.004741 |
| C8  | 2.927340  | 1.149748  | -0.002964 |
| N9  | 5.401464  | -1.286406 | -0.046026 |
| H10 | 6.226052  | -0.714828 | 0.032240  |
| H11 | 5.487262  | -2.266794 | 0.155864  |
| O12 | 0.851251  | -1.786578 | 0.017257  |
| H13 | 0.742839  | 3.525626  | -0.000854 |
| H14 | -0.899460 | 1.472373  | 0.014924  |
| C15 | -2.598742 | -1.722811 | -0.001885 |
| C16 | -4.028895 | -1.721029 | -0.011387 |
| C17 | -4.639921 | -0.514598 | -0.012246 |
| H18 | -4.607884 | -2.633575 | -0.017859 |
| H19 | -5.716886 | -0.409139 | -0.019443 |
| N20 | -1.922933 | -0.571558 | 0.006007  |

**Loose TS for dissociation of  
HG-9MG·[1MC + H<sub>N3</sub>]<sup>+</sup> → 9MG + [1MC + H<sub>N3</sub>]<sup>+</sup>**

Vibrational frequencies (cm<sup>-1</sup>) of products  
(51 vibrations of 9MG + 45 vibrations of  
[1MC + H<sub>N3</sub>]<sup>+</sup>):

97.6,111.8,136.2,165.8,205.1,233.5,314.8,  
323.7,347.7,367.6,465.7,499.2,519.5,571.2,  
592.6,626.7,654.5,677.4,704.6,710.9,749.5,  
790,825.6,991.8,1021.5,1032.8,1064.4,1103.8,  
1109.7,1198.6,1254.2,1281.7,1318.8,1350.5,1392.1,  
1416.1,1419.1,1447.3,1471.5,1519.5,1547.3,1558.1,  
1605.1,1746.5,2915.6,2988.5,3010.4,3089.1,3440.3,  
3457.2,3546.7,57.6,109.1,154,256,308.9,  
344.9,394.1,423.6,446.9,470.2,528.9,595.4,  
638.2,673,734.8,737.7,758.1,765.1,947.8,  
956.4,1025.3,1042.7,1101.4,1110.3,1159.3,1194.2,  
1307.6,1333,1380,1399.5,1410.3,1444.1,1518.2,  
1552.7,1605.3,1638.8,1798.2,2937.6,3024.1,3038.5,  
3076.1,3096.9,3427.1,3437.2,3547.4

Five translational modes (cm<sup>-1</sup>):

10.1, 14.2, 32.6, 34.3, 42.9

Moments of inertia (amu·Å<sup>2</sup>):

815.3, 3323.3, 4131.7

**Loose TS for dissociation of  
HG-[9MG + H<sub>N7</sub>]<sup>+</sup>·1MC → [9MG + H<sub>N7</sub>]<sup>+</sup> + 1MC**

Vibrational frequencies (cm<sup>-1</sup>) of Products  
(54 vibrations of [9MG + H<sub>N7</sub>]<sup>+</sup> + 42 vibrations  
of 1MC):

87.5,101.1,131.7,170.5,202.3,235.7,248.1,  
314.6,344.5,363.9,461,465.8,505.9,569.9,  
597.1,607,645.2,649.1,681.1,688.9,709.1,  
739.5,815.7,834.9,976.4,1027.1,1046.6,1050.5,  
1103.9,1105.7,1130.9,1236,1269.7,1315.7,1346.4,  
1375,1400,1412.5,1437.7,1451.7,1515.7,1531.7,  
1560.4,1606.4,1614.9,1767.3,2938.1,3026.4,3038.3,  
3129.8,3435.8,3459.4,3465.9,3579.5,91.6,125.8,  
177,188.8,242.8,323.1,355.5,394,461.6,  
501.6,546.7,590.6,687.9,732.9,738.5,753.2,  
764.3,920.3,921.9,1021.9,1041.1,1100.1,1117,  
1185.3,1219.1,1291.3,1346.2,1398.8,1401.5,1444.7,  
1465.2,1512.2,1564.4,1638.3,1707.1,2919.1,2996.4,  
3006.7,3056.5,3082.3,3461.5,3590.9

Five translational modes (cm<sup>-1</sup>):

9.4, 13.4, 34.9, 40.2, 44.5

Moments of inertia (amu·Å<sup>2</sup>):

823.6, 3245.4, 4062.5

**Loose TS for dissociation of  
HG-9MG·[1MC + H<sub>O2</sub>]<sup>+</sup> → 9MG + [1MC + H<sub>O2</sub>]<sup>+</sup>**

Vibrational frequencies (cm<sup>-1</sup>) of Products  
(51 vibrations of 9MG + 45 vibrations of  
[1MC + H<sub>O2</sub>]<sup>+</sup>):

97.6,111.8,136.2,165.8,205.1,233.5,314.8,  
323.7,347.7,367.6,465.7,499.2,519.5,571.2,  
592.6,626.7,654.5,677.4,704.6,710.9,749.5,  
790,825.6,991.8,1021.5,1032.8,1064.4,1103.8,  
1109.7,1198.6,1254.2,1281.7,1318.8,1350.5,1392.1,  
1416.1,1419.1,1447.3,1471.5,1519.5,1547.3,1558.1,  
1605.1,1746.5,2915.6,2988.5,3010.4,3089.1,3440.3,  
3457.2,3546.7,28.6,103,212.4,252.6,314.5,  
339,416.3,462.1,469.7,518.3,535.5,566.8,  
587.8,687.8,744.3,747.9,763.4,791.5,939,  
942.8,1020,1049.7,1101.1,1131.9,1176.7,1204.9,  
1287.9,1318.5,1385.2,1405.8,1426.3,1436.9,1486,  
1508.2,1551.6,1614.1,1657.9,2939.6,3027.1,3041.1,  
3083.3,3096.5,3438.7,3560.6,3639.7

Five translational modes (cm<sup>-1</sup>):

7.3, 9.5, 28.0, 40.6, 49.8

Moments of inertia (amu·Å<sup>2</sup>):

866.8, 3133.7, 3993.2
